## **PRSS2 promotes tumor growth and progression by repressing Tsp-1 in the tumor microenvironment via binding to LRP1**

Lufei Sui<sup>1,2\*</sup>, Suming Wang<sup>1,2\*#</sup>, Debolina Ganguly<sup>3</sup>, Tina El Raye<sup>4,5,6</sup>, Cecilie Askeland<sup>7,8</sup>, Astrid Børretzen<sup>7,8</sup>, Kun Zhou<sup>1,2</sup>, Danielle Sim<sup>1</sup>, Ole Johan Halvorsen<sup>7,8</sup>, Gøril Knutsvik<sup>7,8</sup>, Sura Aziz<sup>7,8</sup>, Svein Haukaas<sup>9</sup>, William D Foulkes<sup>10,11</sup>, Diane R. Bielenberg<sup>1,2</sup>, Arturas Ziemys<sup>12</sup>, Vivek Mittal<sup>4,5,6</sup>, Rolf Brekken<sup>3,7</sup>, Lars A. Akslen<sup>7,8</sup>, and Randolph S. Watnick<sup>1,2,7,8,13</sup>

<sup>1</sup> Vascular Biology Program, Boston Children's Hospital, Boston, MA 02115

<sup>2</sup> Department of Surgery, Harvard Medical School, Boston, MA 02115

<sup>3</sup> Hamon Center for Therapeutic Oncology Research and Department of Surgery, UT Southwestern, Dallas, TX

<sup>4</sup> Department of Cardiothoracic Surgery, Weill Cornell Medical College, NY, NY

<sup>5</sup> Department of Cell and Developmental Biology, Weill Cornell Medical College, NY, NY

<sup>6</sup> Neuberger Berman Lung Cancer Center, Weill Cornell Medical College, NY, NY

<sup>7</sup> Centre for Cancer Biomarkers CCBIO, Department of Clinical Medicine, University of Bergen, Bergen, Norway

<sup>8</sup> Department of Pathology, Haukeland University Hospital, Bergen, Norway

<sup>9</sup> Department of Urology, Haukeland University Hospital, Bergen, Norway

<sup>10</sup> Cancer Axis, Lady Davis Institute for Medical Research, Jewish General Hospital, Montreal, Quebec, Canada

<sup>11</sup> Department of Human Genetics, McGill University, Montreal, Quebec, Canada

<sup>12</sup> The program in Mathematics in Medicine, Houston Methodist Research Institute, Houston, TX

<sup>13</sup> To whom correspondence should be addressed ([randy.watnick@childrens.harvard.edu](mailto:randy.watnick@childrens.harvard.edu))

\* These authors contributed equally

# Current address: [suming.wang@vigeotherapeutics.com](mailto:suming.wang@vigeotherapeutics.com)

## **Abstract**

In the earliest stages of tumor development, epithelial tumors (carcinomas) are physically confined to the area of the tissue in which they form. These nascent lesions (carcinomas in situ) are sequestered from the tissue parenchyma by the basement membrane. Within the tissue parenchyma lie a myriad of cell types comprised of fibroblasts, immune and inflammatory cells and endothelial cells. Upon invasion across the basement membrane and into the tissue parenchyma, tumors must manipulate the expression of pro- and anti-tumorigenic proteins such that pro-tumorigenic factors are produced in vast excess to anti-tumorigenic proteins. One such anti-tumorigenic protein is Thrombospondin-1 (Tsp-1). We have previously demonstrated that stimulation of Tsp-1 in the tumor microenvironment (TME) potently inhibits tumor growth and progression and in some cases induces tumor regression. Here, we identify a novel tumor-mediated mechanism to repress the expression of Tsp-1 in the TME via secretion of the serine protease PRSS2. We demonstrate that PRSS2 represses Tsp-1, not via its enzymatic activity, but by binding to the low-density lipoprotein receptor-related protein 1 (LRP1). These findings describe a novel activity for PRSS2 as well as novel ligand and activity for LRP1 and represent a potential therapeutic strategy to treat cancer by blocking the PRSS2-mediated repression of Tsp-1.

## **Introduction**

The paracrine, juxtacrine and exocrine signaling between tumor cells and the non-transformed cells that constitute the tumor microenvironment is one of the key drivers of tumor progression and metastasis. These intercellular signaling pathways

regulate such crucial processes as tumor cell invasion and migration, angiogenesis, and immune and inflammatory cell infiltration<sup>1-3</sup>. The ability of a tumor to alter the activity of the cells in the microenvironment ultimately plays a critical role in growth at both the primary and metastatic sites<sup>4-8</sup>. Like many intracellular processes, the balance between extracellular tumor-promoting factors and tumor-inhibitory factors ultimately determines whether tumors grow and expand beyond the primary site or remain localized or even dormant. For example, pro-invasive proteases can be counteracted by protease inhibitors. Similarly, pro-angiogenic factors, such as VEGF, are balanced by anti-angiogenic factors, such as endostatin and thrombospondin-1 (Tsp-1).

Interestingly, tumor-secreted molecules often promote, or inhibit, tumor growth via more than one mechanism. For example, VEGF was identified as a pro-angiogenic factor<sup>9,10</sup>, but has subsequently been demonstrated to be a potent immunosuppressive factor<sup>11-14</sup>. Tsp-1, on the other hand, is a potent inhibitor of angiogenesis, but also mediates the resolution of inflammation by promoting M1 polarization of macrophages from the M2 state<sup>15</sup>. We have previously identified a tumor-secreted protein, prosaposin, (PSAP) which functions as a paracrine inhibitor of both primary and metastatic tumor growth. PSAP inhibits tumor growth and metastasis primarily via the stimulation of the expression of Tsp-1 in myeloid derived suppressor cells (MDSCs)<sup>4,16</sup>.

In the studies that identified prosaposin as a stimulator of Tsp-1, we also observed the ability of highly metastatic tumor cells to repress Tsp-1 in both the primary and metastatic microenvironment<sup>5</sup>. Here, we report the use of a proteomic screen to identify the tumor-secreted, metastasis-promoting, repressor of Tsp-1 as the serine protease PRSS2. Further, we demonstrate that PRSS2 represses Tsp-1, not via its

protease activity, but by binding to the low-density lipoprotein receptor related protein 1 (LRP1). Strikingly, both knockdown of PRSS2 in tumor cells and knockout of LRP1 in myeloid cells dramatically inhibit tumor growth in mouse models of both breast and pancreatic cancer, with tumors in both models having higher levels of Tsp-1 in the TME. These findings establish a novel intercellular signaling pathway that stimulates tumor growth and progression via the repression of Thrombospondin-1.

## Results

### Metastatic tumors repress Tsp-1 in the tumor microenvironment

We have previously reported that highly metastatic human breast and prostate tumor cells derived from weakly metastatic cell lines via serial *in vivo* passaging repress the expression of the anti-tumorigenic protein Thrombospondin-1 (Tsp-1) in the tumor microenvironment<sup>5</sup>. To determine whether the repression of Tsp-1 is mediated directly by a tumor-secreted protein(s) we harvested conditioned media (CM) from the highly metastatic prostate cancer cell line PC3M-LN4 prostate cancer along with the weakly metastatic parental cell line PC3 and used them to treat primary human lung fibroblasts. We found that only the CM from the metastatic PC3M-LN4 cell line was able to repress the expression of Tsp-1 in lung fibroblasts (Figure 1A and B).

We then turned our attention to the identification of the tumor-secreted protein responsible for the paracrine repression of Tsp-1. For this task we utilized a proteomic screening method previously used to identify prosaposin as a stimulator of Tsp-1 expression (Figure 1C)<sup>5</sup>. Briefly, conditioned media was fractionated over a heparin-sepharose/Cu<sup>2+</sup> column and proteins were eluted with a linear gradient of NaCl plus

10mM imidazole. Collected fractions were then dialyzed into PBS and used to treat primary human lung fibroblasts and Tsp-1 expression was then analyzed by ELISA and western blot. We found that the Tsp-1 repressing activity was present in the fractions that eluted with 1.0 and 1.1M NaCl (Figure 1D and Supplemental Figure S1). These two fractions, along with the inactive fractions that eluted at 0.9 and 1.2M NaCl, were concentrated and analyzed by tandem liquid chromatography-mass spectrometry analysis (Supplemental Figure S2). Analysis of the LC-MS results yielded only one protein that was present in both of the Tsp-1 repressing fractions and absent in the inactive fractions, the serine protease PRSS2. PRSS2 is an anionic trypsinogen and is also referred to as tumor-associated trypsin (TAT), it has been found at elevated levels in tissue and serum of gastric, pancreatic, prostate and ovarian cancer patients<sup>17-21</sup>.

We validated expression of PRSS2 in PC3M-LN4 cells by western blot and found that PC3M-LN4 cells expressed ~10-fold higher levels of PRSS2 than the weakly metastatic PC3 cells, which stimulate Tsp-1 expression in lung fibroblasts<sup>5</sup> (Figure 1E). We then analyzed a set of human breast cancer cell lines for PRSS2 expression, which, consistent with the findings of the prostate cancer cell lines, revealed that its expression level correlated with the metastatic potential of the cell lines (Figure 1F).

### **PRSS2 is necessary and sufficient for paracrine repression of Tsp-1**

Having identified PRSS2 as being present in Tsp-1 repressing fractions of PC3M-LN4 cells we sought to validate whether it was able to repress Tsp-1. Accordingly, we purchased purified recombinant human PRSS2 (rhPRSS2) and used it to treat primary

human lung fibroblasts. By western blot, we found that rhPRSS2 was sufficient to repress Tsp-1 expression in the fibroblasts (Figure 1G).

To determine if PRSS2 was required for the repression of Tsp-1 we silenced its expression in the highly metastatic breast cancer cell line SUM159 via lentiviral transduction of shRNA specific for PRSS2 (Figure 1H). Consistent with the proposed activity of PRSS2, we found that the level of Tsp-1 induction in target cells correlated with the level of repression of PRSS2 by the three independent shRNA constructs transduced into SUM159 cells (Figure 1H). These findings indicate that PRSS2 is both necessary and sufficient for the repression of Tsp-1 in human lung fibroblasts.

We previously demonstrated that highly metastatic derivatives of the prostate cancer cell line PC3, PC3M-LN4, and MDA-MB-231, MDA-LM2 repressed thrombospondin-1 and prosaposin in a c-Myc-dependent manner<sup>5</sup>. Due to the observation that these metastatic cell lines repressed prosaposin concomitantly with upregulation of PRSS2, we examined whether PRSS2 expression was also regulated by the increased c-Myc levels in these cells. We silenced c-Myc using three independent shRNA sequences in SUM159 breast cancer cells and PC3M-LN4 prostate cancer cells and measured the expression of PRSS2. In SUM159 cells the three shRNA sequences repressed Myc by 68%, 59% and one was ineffective (Figure 1I). In PC3M-LN4 prostate cancer cells the three shRNA sequences repressed c-Myc expression by 58%, 93% and 65% (Figure 1J). In both cell lines shRNA#2 was the most effective and when CM from these cells was used to treat lung fibroblasts the repression of Tsp-1 was inhibited by 89% and 82% respectively (Figure 1I and 1J). These findings indicate

that PRSS2 expression is c-Myc dependent and regulated in the opposite manner as prosaposin, which is repressed in a c-Myc dependent manner.

### **PRSS2 enzymatic activity is not required for repression of Tsp-1**

The observation that PRSS2 expression is both necessary and sufficient to repress Tsp-1 in a paracrine acting fashion, suggests two possible mechanisms. The first is that PRSS2 acts as a protease to cleave a substrate that then interacts with a cell surface receptor to repress Tsp-1. The second is that PRSS2, itself, is a ligand for a cell surface receptor and represses Tsp-1 by direct binding and activation of a signal transduction cascade culminating in the repression of Tsp-1.

To test the first hypothesis, we generated point mutations in PRSS2 that inactivate its enzymatic activity. In addition to making mutations in the active site, by mutating the serine at residue 200 to alanine, threonine and cysteine (S200A, S200T, and S200C) we also generated a glycine to arginine substitution at residue 191 (G191R). This mutation has been identified as an inactivating mutation that confers resistance to familial pancreatitis<sup>22</sup>. We then ectopically expressed these four mutant versions of PRSS2 in 293T cells and used the conditioned media to treat lung fibroblasts. We found that all of these mutants were expressed at levels comparable to the wild-type PRSS2 protein (Figure 2A). We then used a colorimetric assay to measure the enzymatic activity of the mutant PRSS2 proteins. The results of this assay confirmed that the G191R and S200A mutants were enzymatically inactive and S200T and S200C retained minimal enzymatic activity (Figure 2B). Strikingly, the CM containing the PRSS2 mutants was able to repress Tsp-1 to the same relative degree

as the wild-type protein (Figure 2C). These findings indicate that the enzymatic activity of PRSS2 is not required for its ability to repress Tsp-1 and suggest that it may function as a ligand for a cell surface receptor.

### **PRSS2 is a novel ligand for LRP-1**

An examination of the existing literature on PRSS2 revealed no reports of it acting as a ligand for a cell surface receptor. Therefore, we performed a co-immunoprecipitation experiment after mixing CM from 293T cells overexpressing PRSS2 with cell lysates from WI-38 lung fibroblasts using a PRSS2 antibody and a control IgG antibody. We then ran the immunoprecipitates on an SDS-polyacrylamide gel and performed a silver stain to visualize any differences (Supplementary Figure S3). We submitted the immunoprecipitate for tandem liquid chromatography/mass spectrometry (LC/MS) analysis to identify unique proteins in the PRSS2 IP sample. Results of the LC/MS analysis identified 325 proteins, with a minimum of three peptide fragments, that were present in the PRSS2 immunoprecipitate and not the IgG control (Supplemental Figure S4). We performed gene ontology analysis (Panther) and independently searched the list of PRSS2-precipitated proteins for known cell surface receptors. Via this analysis we were able to narrow the list of candidate proteins down to only three: integrin  $\alpha 2$  (ITGA2), integrin  $\beta 1$  (ITGB1), and low density lipoprotein-related receptor protein 1 (LRP1).

To confirm that PRSS2 was able to specifically bind to these proteins we repeated the immunoprecipitation experiment and performed western blot analysis for each receptor. We found that PRSS2 was able to reproducibly co-immunoprecipitate



LRP1 but was not able to co-immunoprecipitate ITGA2 or ITGB1 (Figure 2D). To validate these findings, we silenced expression of LRP1 in primary lung fibroblasts via siRNA and confirmed knockdown by western blot (Figure 2E). We then treated these cells with conditioned media from 293T cells that were transiently transfected with PRSS2 and observed that PRSS2 was unable to repress Tsp-1 in cells in which LRP1 expression was silenced. From these results we concluded that LRP1 is the cell surface receptor that mediates PRSS2 repression of Tsp-1 (Figure 2E).

As this is the first observation of PRSS2 binding to LRP1 we sought to identify the binding domain of LRP1 that mediates the interaction between the two proteins. For this experiment we incubated the CM from SUM159 cells with CM from 293T cells transfected with vectors expressing soluble (secreted) truncation mutants of LRP1 consisting of the four binding domains of the protein fused to an N-terminal Myc epitope tag<sup>23</sup>. We found that only LRP1 binding domain 1 co-immunoprecipitated with PRSS2 (Figure 2F). While LRP1 has been reported to have over 50 ligands<sup>24</sup>, PRSS2 represents the first identified protein to bind independently to LRP1 domain 1 (as opposed to proteins, such as  $\alpha$ 2-macroglobulin, which bind to domain 1 but not independently of binding to domain 2 and 4)<sup>23-25</sup>.

We then tested the functional significance of the interactions between PRSS2 and LRP1 by treating lung fibroblasts with CM from 293T cells ectopically expressing PRSS2 in the presence and absence of soluble versions of the LRP1 truncation proteins. The rationale behind this experiment is that if the interactions between PRSS2 and domains 1 and 3 of LRP1 are required for the repression of Tsp-1, then the soluble truncated proteins should serve as decoys to sequester PRSS2 and prevent it from

binding to LRP1. Consistent with the results from the co-IP experiment, incubation of PRSS2 with binding domains 1 and 3 of LRP1 blocked the repression of Tsp-1, while incubation with binding domains 2 and 4 had no effect (Figure 2G).

Finally, we sought to determine the components of the signal transduction cascade downstream LRP1 leading to the repression of Tsp-1. It has been demonstrated that LRP1 ligands can activate both the Rho and Rac GTPases<sup>26,27</sup>. To determine whether Rho or Rac was activated by PRSS2 binding to LRP1 we measured the activation of both GTPases using plate-based G-LISA assays. We found that CM from 293T cells ectopically expressing PRSS2 stimulated Rac-GTPase activity ~2-fold in WI-38 cells but had no effect on Rho-GTPase activity (Figure 2H).

To functionally validate these findings we treated lung fibroblasts with CM from SUM159 cells in the presence and absence of a small molecule inhibitor of Rac1. We found that while CM from SUM159 cells repressed Tsp-1 by 50%, treatment with the Rac1 inhibitor in combination with SUM159 CM resulted in Tsp-1 levels that were 2.6-fold higher than CM alone and 1.3-fold higher than untreated cells (Figure 2I). These findings demonstrate that PRSS2 represses Tsp-1 via activation of Rac1 downstream of binding to LRP1.

Since LRP1 is also an endocytic receptor, we sought to determine whether PRSS2 was taken up by fibroblasts following treatment with CM from PRSS2-overexpressing 293T cells. We harvested wild-type fibroblasts and fibroblasts silenced for LRP1 by siRNA one hour after treatment and examined PRSS2 protein levels by western blot. We found that wild-type fibroblasts had increased levels of PRSS2, but cells silenced for LRP1 did not (Supplemental Figure S5). These findings indicate that

in addition to inducing a Rac-mediated signal transduction cascade leading to the repression of Tsp-1, PRSS2 is also endocytosed by LRP1. Thus, examination of PRSS2 levels in the TME of patients could be an indicator of PRSS2 activity and tumor progression.

### **PRSS2 expression correlates with aggressive features of breast and prostate carcinoma**

The finding that tumor cells repress Tsp-1 in stromal cells via the secretion of PRSS2 suggests that PRSS2 promotes tumor growth and progression and could be a novel therapeutic target. To determine whether PRSS2 has any potential clinical relevance to disease stage or progression, we evaluated its expression by immunohistochemistry in series of human breast and prostate cancers (Figure 3A and B). In a population-based breast cancer series (Series 1, n=518), strong and consistent associations were found between PRSS2 expression and multiple features of aggressive tumors, such as high histologic grade, lack of expression of estrogen receptor (ER), tumor cell proliferation (by Ki67 expression), CK5/6 expression (basal marker), and increased angiogenesis (by pMVD and GMP) (Table 1). In a *BRCA*-based breast cancer series (Series 2, n=202), which was enriched for cases with germline *BRCA1* or *BRCA2* mutations, strong associations with high histologic grade, tumor cell proliferation (by mitotic count), and p53 expression were present (Supplementary Table 1). In contrast, no associations with *BRCA*-status were found. Notably, these associations (Series 1-2) were found for PRSS2 expression in both tumor epithelium and when recorded separately in the stromal compartment. PRSS2 expression in tumor cells and in the associated stroma

was significantly associated (Spearman's correlation: Series 1,  $\rho=0.36$ ,  $p<0.0005$ ; Series 2,  $\rho=0.45$ ,  $p<0.0005$ ).

In localized prostate cancer (Series 1,  $n=338$ ), PRSS2 expression in tumor cells was associated with increased tumor cell proliferation (by Ki67 expression), and with increased VEGF-A (Figure 3B and Table 2). By univariate survival analyses (Series 1;  $n=338$ ), strong PRSS2 was associated with shorter time to clinical recurrence ( $P=0.010$ ), and it was borderline associated with biochemical recurrence ( $P=0.071$ ) (Figure 3C and Supplementary Figure S6). By multivariate survival analyses (Series 1,  $n=338$ ), where PRSS2 was included in addition to the standard prognostic variables Gleason score ( $\geq 4+3$  versus  $\leq 3+4$ ), pathological stage ( $\geq pT3$  versus  $pT2$ ) and preoperative s-PSA (dichotomized by upper quartile), strong PRSS2 independently predicted biochemical recurrence, loco-regional recurrence, and clinical recurrence ( $HR=1.4-2.5$ ,  $P=0.001-0.052$ ), together with Gleason score and pathological stage, and for biochemical recurrence, s-PSA.

Strikingly, and consistent with the observation that c-Myc oppositely regulates PRSS2 and PSAP, PRSS2 was strongly and inversely associated with PSAP expression (**Table 3**). Specifically, of the 25 patients with low levels of PSAP, all of them had high levels of PRSS2. This finding suggests that upregulation of c-Myc promotes tumor progression by upregulating PRSS2 and concomitantly repressing PSAP expression. Finally, by univariate survival analyses of castration resistance prostate cancer ( $n=32$ ), strong PRSS2 expression was associated with shorter time from diagnosis to death ( $P=0.006$ ) (Figure 3D).

## **PRSS2 is required for efficient tumor growth**

The observations that more aggressive breast and prostate cancer cell lines express higher levels of PRSS2 than their less metastatic counterparts coupled with the corroboration of these findings in patient samples led us to hypothesize that disrupting PRSS2 expression could inhibit tumor growth. This hypothesis logically follows our previous demonstration that stimulation of Tsp-1 via both ectopic expression of Prosaposin and systemic delivery of a therapeutic peptide derived from Prosaposin potently inhibits both primary and metastatic tumor growth<sup>4,5,16</sup>. We tested this hypothesis by orthotopically injecting the triple negative breast cancer (TNBC) cell line SUM159 transduced with a lentiviral vector that specified an shRNA specific for PRSS2 that inhibited the repression of Tsp-1 *in vitro* (Figure 1G and H). In order to rule out the possibility that any potential observed differences in tumor growth might be attributable to an impairment of cellular proliferation, we measured the growth rate of both vector control and shPRSS2 SUM159 cells. This analysis revealed that silencing PRSS2 had no statistically significant impact on cellular proliferation, as both cell lines reached confluence within 3 days of plating (Figure 3E).

We then injected  $1 \times 10^6$  vector control and SUM159shPRSS2 cells, expressing firefly luciferase, orthotopically into the mammary gland of SCID mice (n=8 mice per cohort). After 40 days, the vector control tumors had reached a significant size, as determined by both luciferase intensity and gross visual inspection (Figure 3F-I). Conversely, the SUM159-shPRSS2 cells formed tumors that were barely detectable by luciferase activity and undetectable by gross visual inspection (Figure 3F-I). In fact, 5/8

mice injected with SUM159shPRSS2 cells developed tumors smaller than 4mm<sup>3</sup> (less than 2mm in diameter) and on average the tumors were 11.5-fold smaller than tumors formed by SUM159 vector control cells (1657mm<sup>3</sup> vs 144mm<sup>3</sup>, P<0.001 by Mann-Whitney U test) (Figure 3F and I). We then examined the tumors histologically by both H&E and Tsp-1 expression. We found that Tsp-1 expression was significantly higher in tumors formed by the shPRSS2 cells than the vector control cells (Figure 3J). Of note, the size of the shPRSS2 tumors (1-2mm in diameter) was consistent with previously published reports of dormant tumors in which Tsp-1 was highly expressed, either endogenously or ectopically<sup>28,29</sup>. These findings indicate tumor-secreted PRSS2 stimulates tumor growth via paracrine signaling to repress Tsp-1 in the tumor microenvironment and not via tumor cell autonomous effects.

### **Loss of PRSS2 does not inhibit tumor growth in the absence of Tsp-1**

Based on the observation that silencing PRSS2 in SUM159 cells significantly inhibited tumor growth, we asked whether this was due to the inability of these cells to repress Tsp-1 in the TME. We postulated that in the absence of Tsp-1 silencing PRSS2 should have little to no effect on tumor growth. To test this hypothesis, we made use of Tsp-1<sup>-/-</sup> mice and silenced PRSS2 in the syngeneic C57B6/J derived pancreatic cancer cell line, Pan02<sup>30</sup> (Supplemental Figure S7). We examined the effect of PRSS2 in pancreatic tumor growth and progression due to the reports that PRSS2 overexpression is a contributing factor to pancreatitis, which is a precursor lesion for pancreatic cancer<sup>31,32</sup>. Specifically, we injected 5x10<sup>5</sup> parental Pan02 cells and Pan02shPRSS2 orthotopically into the head of the pancreas of wt and Tsp-1<sup>-/-</sup> C57Bl6/J mice (n=8 mice per cohort)

(Figure 4A). We monitored tumor growth via in vivo luciferase imaging and euthanized all mice when the wt mice injected with wtPan02 cells became moribund due to ascites development at 28 days post-injection. We then measured the volume and mass of all tumors and found that in wt mice, the tumors formed by Pan02shPRSS2 cells were <50% the size of vector control Pan02 tumors (528mg vs 1082mg; P=0.002, by Mann-Whitney U test) (Figure 4B and C). Conversely, in Tsp-1<sup>-/-</sup> mice, the difference in size of tumors formed by Pan02shPRSS2 cells compared to tumors formed by vector control Pan02 cells was not statistically significant (711mg vs 779mg; P=0.588 by Mann-Whitney U test (Figure 4C). We also stained all tumors for Tsp-1 expression via immunohistochemistry and found that in wt mice, Pan02 tumors had little to no detectable Tsp-1 expression, while Pan02shPRSS2 tumors had significantly higher Tsp-1 levels (Figure 4D). As expected, all of the tumors in Tsp-1<sup>-/-</sup> mice had no detectable Tsp-1 by IHC (Figure 4D). Finally, upon gross examination of mice at the time of necropsy, we observed that 4/8 mice injected with Pan02 vector control cells developed large metastases on the wall of the peritoneal cavity and diaphragm, while 0/8 mice injected with Pan02shPRSS2 cells developed detectable metastases (Figure 4E-G). These findings demonstrate that loss of PRSS2 significantly inhibits both primary tumor growth and metastasis. However, in the absence of Tsp-1, loss of PRSS2 does not significantly inhibit tumor growth, indicating that the major role of PRSS2 in tumor growth is the paracrine-mediated repression of Tsp-1.

### **Repression of Tsp-1 creates an immunosuppressive tumor microenvironment**

Given the profound effects silencing PRSS2 has on inhibiting tumor growth and progression we sought to determine whether modulating Tsp-1 expression in the TME had any effect on the immune and inflammatory cell composition. Additionally, it has been demonstrated that regulatory T cells (T regs) express high levels of CD36, which makes them metabolically dependent on free fatty acid uptake<sup>33</sup>. Since Tsp-1 binds to CD36 and blocks fatty acid uptake, in addition to inducing apoptosis<sup>34,35</sup>. We postulated that tumors in which PRSS2 was silenced, and consequently express high levels of Tsp-1 would have fewer Tregs and a higher ratio of CD8+ T cells to Tregs. Accordingly, we analyzed the Pan02 and Pan02shPRSS2 tumors that formed in WT and Tsp-1<sup>-/-</sup> mice for T cell markers.

We performed immunohistochemical analysis of total T cells (CD3+), CD4+ T cells, CD8+ T cells, and FoxP3+ Tregs. We found that the percentage of Tregs decreased 9-fold, from 4.5% of all T cells to 0.48% of all T cells (P=0.05, by Mann-Whitney U test) (Figure 4H and I). Strikingly, in Tsp-1<sup>-/-</sup> mice the percentage of Tregs was virtually identical between Pan02 and Pan02shPRSS2 tumors (4.4% vs 6.95%, P=0.63, by Mann-Whitney U test). Moreover, though the percentage of CD3+/CD8+ T cells was not significantly different between the two groups, the ratio of CD8+:FoxP3+ T cells was increased in tumors formed by Pan02shPRSS2 cells (Supplemental Figure S8). These findings indicate that the repression of Tsp-1 results in the generation of an immunosuppressive tumor microenvironment with high levels of regulatory T cells and blocking this repression dramatically reduces Treg infiltration resulting in a more active tumor immune microenvironment.



## **Myeloid-specific genetic deletion of LRP1 prevents PRSS2-mediated repression of Tsp-1 *in vivo***

We have previously demonstrated that genetic deletion of Tsp-1, in the entire mouse or specifically in bone-marrow derived cells, abrogates the ability of PSAP to inhibit tumor growth<sup>4,5</sup>. Accordingly, we specifically deleted LRP1 in myeloid derived cells by crossing LysM-Cre mice with LRP1<sup>fllox/fllox</sup> mice (Supplemental Figure S9A and B). FACS analysis also revealed that LRP1 was predominantly expressed by CD11b<sup>+</sup> cells, as opposed to T (CD3<sup>+</sup>) and B (B220<sup>+</sup>) cells (Figure 5A and B). Importantly, myeloid specific knock out of LRP1 did not affect production of myeloid cells in these mice (Figure 5C and Supplemental Figure S10).

We then sought to determine whether the disruption of PRSS2-LRP1 mediated repression of Tsp-1 could inhibit primary tumor growth. To that end, we injected both wild-type C57BL6/J mice and LysM-Cre-LRP1<sup>-/-</sup> mice with the murine triple negative breast cancer cell line E0771. Strikingly, we found that tumors formed by E0771 tumors in the myeloid specific LRP1 knockout mice were 28.3-fold smaller than tumors formed in wild-type mice (54.9mm<sup>3</sup> vs 1,531mm<sup>3</sup>; P=0.002 by Mann-Whitney U test) (Figure 5D and F). Moreover, 4 of the 8 LysM-Cre-LRP1<sup>-/-</sup> mice developed tumors that were less than 2mm in diameter (Figure 5E). Histologic analysis of the tumors that formed in the LysM-Cre-LRP1<sup>-/-</sup> mice revealed abundant Tsp-1 in the TME, while tumors that developed in the wt C57BL6/J mice had virtually undetectable levels Tsp-1 in the TME (Figure 5G). To confirm that the loss of LRP1 inhibited tumor growth due to the inability of tumors to repress Tsp-1, we crossed the LysM-Cre-LRP1<sup>-/-</sup> with Tsp1<sup>-/-</sup> mice to generate double knockout (DKO) mice that lacked Tsp-1 globally and LRP1 in myeloid

cells (Figure S6B). The logic behind creating these mice was that if tumors could not repress Tsp-1 in the absence of LRP1, then deleting Tsp-1 should allow tumors to grow in LRP1<sup>fl/fl</sup> mice with similar kinetics to wild-type mice. We injected  $1 \times 10^6$  E0771 cells into the mammary gland of the DKO mice and monitored tumor growth by direct measurement. We found that the average size of E0771 tumors that formed in the DKO mice ranged between 75-93% of the size of the tumors that formed in wild-type mice. Moreover, tumors that formed in the DKO mice had undetectable levels of Tsp-1 by IHC, as expected (Figure 5D-G). These findings indicate that LRP1 on myeloid cells is required for the PRSS2-mediated repression of Tsp-1 in the TME and that the inability to repress Tsp-1 in the TME significantly impairs tumor growth.

## Discussion

The ability of tumor cells to modify their microenvironment to create a site that is permissive for growth is a key factor in distinguishing aggressive, metastatic tumors from localized tumors. It has been previously reported that the tumor cell autonomous repression of Tsp-1 is required for tumors to escape dormancy<sup>36,37</sup>. Here we demonstrate that repression of Tsp-1 in the tumor microenvironment is also required for tumors to escape dormancy.

In this report we describe the identification of a novel stimulator of tumor growth and metastasis, the serine protease PRSS2. Of note, we demonstrate that the tumor growth promoting activity of this protein lies not in its enzymatic activity but in its ability to act as a ligand for the cell surface receptor LRP1. In doing so we also discovered a

novel biologic activity for the LRP1/Rac pathway, the repression of the ant-angiogenic, anti-tumorigenic, and anti-inflammatory protein Tsp-1.

Significantly, silencing PRSS2 in tumor cells significantly attenuates tumor growth and metastasis. Additionally, silencing PRSS2 also resulted in tumor microenvironments that were less immunosuppressive as evidenced by decreased infiltration of regulatory T cells and increased ratio of CD8:Treg ratios. Critically, these alterations in the immune cell composition of the TME were Tsp-1-dependent as they were not observed in Tsp-1<sup>-/-</sup> mice. Finally, specific genetic deletion of the receptor for PRSS2, LRP1, in myeloid cells recapitulates the tumor inhibitory effects of silencing PRSS2.

Critically, the experimental findings that PRSS2 is required for efficient tumor growth were validated by the observation that PRSS2 expression correlates with aggressive clinical features such as angiogenesis, tumor cell proliferation, disease progression and survival in breast and prostate cancer patients. We previously demonstrated that tumors that express high levels of prosaposin (PSAP) remain localized and metastasize with very low frequency due to the induction of Tsp-1 expression in the TME<sup>4,5,16</sup>. The progression, or lack thereof, of tumors could thus potentially be explained as a competition between PRSS2 and PSAP. If tumors make more PSAP than PRSS2 they will grow more slowly and if tumors make more PRSS2 than PSAP they will progress more rapidly. This hypothesis was born out by the observations that PRSS2 expression negatively correlates with PSAP expression in prostate cancer.

Based on the findings presented in this report, we predict that therapeutic strategies, which augment PSAP activity and inhibit PRSS2 binding to LRP1 could hold tremendous promise for treating patients. Significantly, this strategy should have relatively few adverse effects, as the relevant agents would not have direct cytotoxic activity. Moreover, since these therapeutic agents would target biological mechanisms in genetically normal cells that comprise the tumor microenvironment they would be less likely to induce resistance.

## **Experimental Methods:**

### **Cell culture and siRNA transfection**

WI-38 cells were cultured in Minimal Essential Media (MEM), containing 10% fetal bovine serum (FBS) and 1% penicillin/streptomycin at 37°C. Cells were seeded the day before the experimentation and were subjected to PRSS2 transient transfection at a density of 80% confluence using Lipofectamine 3000 according to manufacturer's protocol (Invitrogen). For siRNA transfection, WI-38 cells were transiently transfected with 25 nM siLRP1 (Sigma) using Lipofectamine 3000 according to manufacturer's protocol (ThermoFisher). Gene silencing was confirmed by immunoblotting 72 hours post transfection.

### **Treatment of cells with chemical inhibitors and recombinant protein**

WI-38 cells were seeded 24 hours before the treatment and synchronized for 2 hours in serum-free medium. Synchronized cells were treatment with 25µM Rac1 inhibitor (Millipore), or 25µM Nutlin3 (Sigma), or PRSS2 conditioned medium for 16 hours and subjected to immunoblot analysis.

### **Western blot analysis**

Western blot was prepared as described. The following primary antibodies were used: Tsp1 (rabbit pAb, Abcam), p53 (DO-1 mouse mAb, Santa Cruz), LRP1 (rabbit pAb, Cell Signaling Technologies), β-actin (mouse mAb AC-15, Abcam).

### **Generation of PRSS2 mutants**

Single mutation of PRSS2 in pCMV-Sport6 vector (Harvard Plasmid Repository) (G191R, S200A, S200C and S200T) were introduced by site directed mutagenesis using QuikChange Lightning Site-Directed Mutagenesis Kit according to manufacturer's protocol (Agilent Technologies). To express PRSS2 WT and Mutants protein, transient transfections were carried out in HEK293 cells cultured in 6-well culture plate using Lipofectamine 3000 and 2µg of PRSS2 wild-type or mutations were used. The

transfection medium was replaced with serum-free DMEM medium 48 hours after transfection and conditioned medium containing secreted PRSS2 WT and mutation protein was collected after additional 24 hours.

### **Activity assay of recombinant PRSS2 WT and mutants.**

Recombinant PRSS2 and mutation protein was overexpressed in HEK293 cells as described above. Cells were cultured in DMEM phenol red free medium to reduce background reading for fluorescence assay. Conditioned medium (100µl) was supplemented with 0.1M Tris-HCl (pH 8.0), 1mM CaCl<sub>2</sub> (final concentrations). PRSS2 activity were determined with 21.5 µM Mca-RPKPVE-Nval-WRK(Dnp)-NH<sub>2</sub> Fluorogenic MMP Substrate (R&D Systems) (final concentration) and incubated at 25°C. Activity were measured every 10 minutes for total 70 minutes and expressed as percentage of potential total enzymatic activity. Triplicate experiments were performed for each construct.

### **Co-Immunoprecipitation**

WI-38 cells from 15cm dishes were collected and lysed in lysis buffer (25 mM Tris (pH 7.2), 150 mM NaCl, 5 mM MgCl<sub>2</sub>, 0.5% NP-40, 1 mM DTT, 5% glycerol) containing fresh protease inhibitor and phosphatase inhibitor cocktail (ThermoFisher), followed by centrifugation to remove cellular debris. Lysates were pre-cleared by incubating with 20 µl protein A/G agarose suspension for 1 hour at 4°C. The pre-cleared lysates were incubated with 10 µg PRSS2 antibody (Abcam) overnight at 4°C, followed incubation with 60 µl protein A/G agarose suspension for 3 hours at 4°C. Agarose beads were then collected by centrifugation, washed 4 times with 50mM Tris, 150mM NaCl, and 0.1% Tween-20, and resuspended in 100 µl RIPA buffer containing 6X SDS sample buffer. Samples were boiled for 5 minutes and the supernatant were collected after centrifugation for mass spectrometry analysis.

### **Rac1 and RhoA GTPase activation assay**

Rac1 and RhoA GTPase activation was measured by G-LISA Rac1 activation assay Kit and G-LISA RhoA activation Kit (Cytoskeleton), according to manufacturer's protocol. Briefly, WI-38 cells were serum starved for 2 hours, and the 293T conditioned medium with pCMV (control vector) and pCMV\_PRSS2 vector overexpression was added to the serum starved cells for 45 min. The cells are washed with cold PBS and lysed in ice-cold lysis buffer containing protease inhibitors. Protein concentrations were measured, and the same amount of protein was used under each condition. The cell lysates were incubated in Rac1 and RhoA assay wells along with blank control and positive control for 30 min at 4°C with agitation at 400rpm. The wells were washed with Wash Buffer followed by incubation with Antigen Presenting Buffer at room temperature. The primary and secondary antibodies were incubated at room temperature for 45 min. The HRP detection reagent were incubated in each well for exact 3 min and the luminescence signal were detected using a microplate luminescence reader.

### **Animal breast cancer model**

All animal work was conducted in accordance with a protocol approved by the Institutional Animal Care and Use Committee (IACUC) of Boston Children's Hospital. Female SCID mice (n=8/ group) (6-8 weeks old) were purchased from Mass General Hospital. For orthotopic breast cancer cell injection, SUM159 vector\_luc and SUM159 shPRSS2\_luc cells were injected into the mammary fat pad of the female SCID mice ( $1 \times 10^6$  cells/ 20 $\mu$ l). The tumor burden was monitored weekly by both bioluminescence imaging using Xenogen IVIS system and tumor size measurement by caliper.

Myeloid-specific LRP1 knock out mice were generated by crossing LysM-Cre mice with LRP1<sup>flox/flox</sup> mice. Murine triple negative breast cancer cell line E0771 ( $1 \times 10^6$  cells/ 20 $\mu$ l) were orthotopically injected into the mammary fat pad of the female LysM-Cre-LRP1<sup>-/-</sup> mice (n=8/group) (6 weeks old) and wild-type C57BL6/J mice (n=8/group) (6 weeks old). The tumor size was measured twice a week by caliper.

LRP1 and Tsp-1 double knock out (DKO) mice were generated by crossing LysM-Cre-LRP1<sup>-/-</sup> with Tsp1<sup>-/-</sup> mice. The double knockout was confirmed by genotyping using the following primers:

Lrp1<sup>flox</sup>\_F: CATACCCTCTTCAAACCCCTTCCTG,  
Lrp1<sup>flox</sup>\_R: GCAAGCTCTCCTGCTCAGACCTGGA,  
Tsp1\_F: GAGTTTGCTTGTGGTGAACGCTCAG,  
Tsp1wt\_R: AGGGCTATGTGGAATTAATATCGG,  
Tsp1ko\_R: TGCTGTCCATCTGCACGAGACTAG.

E0771 cells ( $1 \times 10^6$  cells/ 20 $\mu$ l) were orthotopically injected into the mammary fat pad of the female DKO mice (n=10/group) (6 weeks old). The tumor size was measured twice a week by caliper.

### **Animal pancreatic tumor model**

Thrombospondin-1 deficient mice (Tsp-1<sup>-/-</sup>, n=8/ group) were purchased from the Jackson Laboratory (#006141) and maintained by mating Tsp-1<sup>-/-</sup> males with Tsp-1<sup>-/-</sup> females. C57BL6/J mice (n=8/ group) (8 weeks old) were purchased from the Jackson Laboratory (#000664) and used as Tsp-1<sup>+/+</sup> controls. For orthotopic pancreatic cancer cell injection, pancreatic cell lines wtPan02\_luciferase and Pan02shPRSS2\_luciferase ( $5 \times 10^5$  cells/ 10  $\mu$ l), washed and harvested in HBSS and mixed 1:1 with Matrigel, were injected into the tail of the pancreas (20  $\mu$ l total volume). The tumor burden was determined weekly by bioluminescence imaging using Xenogen IVIS system initiated 7 days post injection.

### **Thrombospondin-1 immunohistochemistry**

Tumor samples were fixed in 10% paraformaldehyde and subsequently paraffin-embedded for sectioning. The paraffin-sectioned slides were deparaffinized with xylene and rehydrated in decreasing concentration of ethanol to water. For Thrombospondin-1 staining, the antigen retrieval was performed with proteinase K (Roche Diagnostics) at a final concentration of 20  $\mu$ g/ml in 0.2 M Tris pH 7.2 at 37°C for 25 min. The slides were then blocked with 2.5% goat serum (Vector Laboratories) for 30 min at room temperature. Slides were incubated overnight at 4°C with primary antibody rabbit anti-Thrombospondin-1 (ab226383, Abcam) The slides were then washed in PBS with

0.05% Tween (3 times for 5 min), followed by incubation with HRP conjugated secondary antibody (Vector Laboratories) for 30 min at room temperature. Slides were then incubated with DAB substrate (Vector Laboratories) followed by counterstain with Hematoxylin (Vector lab, H3401).

Immunohistochemistry (IHC) was performed as previously described (Sorrelle et al., Journal of Immunology 2019). Briefly, slides were warmed in a 60 °C oven for 10 min followed by deparaffinization and rehydration. Before antigen retrieval, slides were fixed in 10% neutral buffered formalin for 30 minutes. Antigen retrieval was performed in antigen retrieval buffer (10 mM Tris-HCl, 1 mM EDTA with 10% glycerol [pH 9]) at 110 °C for 17 min (~4–5ψ). Slides were then allowed to be cooled down to room temperature and were washed once with PBS. Tissue sections were blocked with 2.5% goat serum (Vector Laboratories, S-1012) for 30 min followed by incubation with primary antibody overnight: CD4 (1:1000; Abcam, ab183685), Foxp3 (1:200; R&D Systems, MAB8214). After washing, the slides were incubated with HRP conjugated secondary Antibody (ImmPRESS; Vector Laboratories, MP-7401) for 30 min on a shaker. For developing the fluorescence signal, TSA detection system (PerkinElmer) was used. We used OPAL 520, OPAL 570 and OPAL 690 fluorophores for staining the different markers. Multiplex staining was performed by stripping the previous antibody in 10 mM citrate buffer (pH 6.2) plus 10% glycerol at 110 °C for 2 min before probing with the next primary antibodies in the next two consecutive rounds: CD3 (1:2000; Thermo Fisher Scientific, PA1-29547), and CD8 (1:4000; Cell Signaling, 98941). Slides were counter-stained with DAPI and then cover slipped using ProLong Gold mount (no. P36931; Life Technologies). Slides were scanned at 20X using the Zeiss AxioScan.Z1 (Whole Brain Microscopy Facility, UT Southwestern). The following channels were used to acquire images: DAPI, AF488 (for OPAL 520), AF555 (for OPAL 570), and AF660 (for OPAL 690).

### **Breast cancer patient series**

Two independent breast cancer series were immunohistochemically stained for PRSS2 protein. Series 1 is a population-based series of 544 primary breast carcinomas from the period 1996-2003, and Series 2 is a case-control series of 202 primary breast carcinomas (53 *BRCA1*, 45 *BRCA2* and 104 *BRCA* non-mutated) from the period 1986-2005, as previously described<sup>38,39</sup>. Twenty-six cases from Series 1 and 30 cases from Series 2 were excluded due to technical inadequate material, leaving 518 and 172 cases for evaluation of PRSS2 staining. Outcome data was only available for Series 1 and included survival time, survival status and cause of death. Last date of follow-up was June 30, 2017 (median follow-up time of survivors, 216 months; range 166-256). During follow-up, 87 patients (17%) died of breast cancer, and 199 (23%) died of other causes.

The study was approved by the Western Regional Committee for Medical and Health Research Ethics, REC West (REK 2014/1984) (Series 1) and the Institutional Review Board at McGill University Hospital, A03-M33-02A (Series 2). All studies were performed in accordance with guidelines and regulations by the University of Bergen and REK, and in accordance with the Declaration of Helsinki Principles.

### ***Clinico-pathologic variables***

The following variables were available: age at diagnosis, tumor diameter, histologic type, histologic grade, lymph node status, hormonal (ER, PR) and HER2 receptor status, proliferation markers (Ki67, mitotic count), CK5/6 (basal marker), p53 protein expression, proliferating microvessel density (pMVD) (nestin and Ki67 co-expression, series 1; Factor VIII and Ki67 co-expression, series 2) <sup>40</sup>. The glomeruloid microvascular phenotype (GMP), a marker of increased tumor associated angiogenesis, was available for a subset of series 1 <sup>41</sup>.

### ***PRSS2 Immunostaining***

Manual staining for PRSS2 was primarily performed on tissue microarray (TMA) sections, and regular sections were used in cases with poor quality or insufficient tumor material for evaluation in the TMA cores (72 cases in Series 1). The sections (5 µm) with formalin-fixed and paraffin-embedded tissue were deparaffinized with xylene, rehydrated in decreasing concentrations of alcohol and rinsed in distilled water. The slides were boiled in buffered solution at pH6 (DAKO S1699) using a microwave oven for 20 min at 350 W. After 15 min of cooling and addition of distilled water to reduce the fluid to room temperature, the slides were moved to a humidifying chamber (Magnetic Immuno Staining Tray, Cell Path, UK). To reduce the endogenous peroxidase, a peroxidase-blocking agent (DAKO S2023) was added for 8 minutes. Between the different steps, rinsing with buffered saline solution (DAKO S3006) was performed. The sections were incubated for 60 minutes at room temperature with the rabbit antibody PRSS2 (Center) (Sigma-Aldrich, SAB 1307060) diluted 1:50 in antibody diluent with background reducing components (DAKO S 3022). A secondary antibody (HRP EnVision rabbit (DAKO K4003) was added for 30 minutes at room temperature. For visualization, DAB (DAKO K3468) was used as chromogen and the slides were counterstained with hematoxylin (DAKO S3301). Multiorgan TMA sections were included as positive and negative controls. The negative controls were obtained by adding antibody diluent without the primary antibody.

### ***Evaluation of PRSS2 staining in tumor cells and stroma***

PRSS2 staining in tumor cells was recorded using a semi-quantitative and subjective grading system, considering the intensity of staining (none=0, weak=1, moderate=2 and strong=3) and the proportion of tumor cells showing a positive reaction (<10%=1, 10-50%=2, >50%=3). A staining index (values 0-9) was calculated as a product of staining intensity (0-3) and proportion of immunopositive cells (1-3) <sup>42</sup>. The evaluation of PRSS2 staining in the tumor stroma (tumor microenvironment staining, TME) was a combined subjective recording of the intensity of staining in cells present in the stroma compartment, mainly immune cells and fibroblasts (none=0, weak=1, moderate=2 and strong=3). If the staining intensity in stromal cells was heterogenous, the scoring was based on the predominant pattern.

As there is yet no validated cut-off value for PRSS2 expression, the distribution and frequency histograms for SI and intensity were evaluated. PRSS2 expression in tumor cells was considered low for SI 0-6 (88%) and high for SI 9 (12%) in Series 1 (upper



quartile), and low for SI 0-4 (66%) and high for SI 6-9 (34%) in Series 2 (median). Stromal PRSS2 expression was considered low for staining intensity 0-2 (83% and 76%), and high for staining intensity 3 (17% and 24%) in Series 1-2.

### ***Statistical analysis***

Data were analyzed using the SPSS Statistics for Windows, Version 25.0. (IBM Corp., Armonk, NY, USA). Statistical significance was assessed at the two-sided 5% level, whereas borderline statistical significance was defined as P-values between 5% and 10%. Associations between categorical variables were evaluated using the Pearson's  $\chi^2$  test or Fisher's exact test, as appropriate, and odds ratios (OR) were computed. Univariate survival analyses were carried out using the Kaplan-Meier method with significance determined by the log-rank test. The endpoint in survival analyses was breast cancer specific survival (BCSS) (Series 1). Entry date was the date of diagnosis. Patients who died from other causes were censored at the date of death.

### ***Prostate cancer patient series***

Different series of prostatic tissues were used. Series 1 includes carcinoma tissues from 338 patients treated by radical prostatectomy for clinically localized prostate cancer (Haukeland University Hospital, Bergen, Norway, during 1986-2007), with follow-up until September 2016 (median follow-up for survivors 157.1 months; biochemical recurrence or clinical recurrence (local or distant) were recorded as endpoints). Series 2 includes tissues from 33 patients with castration-resistant prostate carcinoma receiving palliative treatment with transurethral resection of the prostate during 1990-2005 (follow-up with respect to deaths). Univariate survival analyses were carried out using the Kaplan-Meier method with significance determined by the log-rank test.

The study was approved by the Western Regional Committee for Medical and Health Research Ethics, REC West (REK 2015/2178) (Series 1,2). All studies were performed in accordance with guidelines and regulations by the University of Bergen and REK, and in accordance with the Declaration of Helsinki Principles.

### ***Clinico-pathologic variables***

Clinico-pathologic information were retrieved from the clinical patient files and pathology reports for the patients in Series 1. The information included age at diagnosis, preoperative and postoperative s-PSA, clinical TNM stage, Gleason grading, largest tumor dimension, involvement of surgical margins, extra-prostatic extension, seminal vesicle invasion, and pelvic lymph node status at prostatectomy.

Follow-up information involved time from surgery until biochemical recurrence, clinical recurrence, loco-regional recurrence, skeletal metastasis and death, including prostate cancer specific death for the patients in Series 1, and time from castration resistance to death for the patients in Series 2.

Tissue microarrays consisted of three tissue cores from each case (diameter 0.6-1.0 mm), selected from areas with highest tumor grade. Regular slides were used for the skeletal metastases.

### ***PRSS2 Immunostaining***

Immunohistochemical staining for PRSS2 was performed manually. Tissue microarray (TMA) sections and regular sections (5  $\mu$ m) from formalin-fixed and paraffin-embedded tissue were deparaffinized with xylene, rehydrated in decreasing concentrations of alcohol and rinsed in distilled water. The slides were boiled in buffered solution at pH6 (DAKO S1699) using a microwave oven for 20 min at 350 W. After 15 min of cooling and addition of distilled water to reduce the fluid to room temperature, the slides were moved to a humidifying chamber (Magnetic Immuno Staining Tray, Cell Path, UK). To reduce the endogenous peroxidase, a peroxidase-blocking agent (DAKO S2023) was added for 8 minutes. Between the different steps, rinsing with buffered saline solution (DAKO S3006) was performed. The sections were incubated for 60 minutes at room temperature the rabbit antibody PRSS2 (Center) (Sigma-Aldrich, SAB 1307060) diluted 1:25 in antibody diluent with background reducing components (DAKO S 3022). A secondary antibody (HRP EnVision rabbit (DAKO K4003) was added for 30 minutes at room temperature. For visualization, DAB (DAKO K3468) was used as chromogen and the slides were counterstained with hematoxylin (DAKO S3301). Multiorgan TMA sections were included as positive and negative controls. The negative controls were obtained by adding antibody diluent without the primary antibody.

### ***Evaluation of PRSS2 staining in tumor cells***

PRSS2 was mainly localized in the tumor cell cytoplasm, whereas membrane staining was observed in a few cases. The staining was recorded by a semi-quantitative and subjective grading system. A staining index (SI, values 0-9) was obtained as the product of the staining intensity (none = 0, weak = 1, moderate = 2 and strong = 3) and the proportion of positive tumor cells (<10%=1, 10-50%=2, >50%=3). In addition to staining benign and malignant prostate tissue, PRSS2 staining was noted in inflammatory cells, nerve tissue and vessels. Results on cytoplasmic expression is reported in this study, and cytoplasmic PRSS2 expression was considered strong for SI  $\geq$ 6 (median in Series 1 and upper quartile in Series 2 [CRPC]).

For the prostate series, intra-observer agreement was tested by blinded re-evaluation of a randomly selected subset of 50 cases from Series 1 and of the 33 cases in Series 2 after two months. Intra-observer agreement was very good or perfect with Kappa-values of 0.80 (by SI) and 0.86 (by median SI) for Series 1 and 0.92 (by SI) and 1.0 (by upper quartile SI) for Series 2.

### ***Statistical analysis***

The SPSS statistical package (IBM Corp., Armonk, NY, USA), version 25.0 was used for statistical analyses. Associations between categorical variables were evaluated by Pearson's chi-square test or Fisher's exact test. The Mann-Whitney U or Kruskal-Wallis tests were used for continuous variables. Univariate survival analyses were carried out by the product-limit method and log-rank tests, and Kaplan-Meier plots were made for

visualization. Multivariate survival analyses were performed using the Cox' proportional hazards method and the likelihood ratio test ( $P \leq 0.15$  in univariate survival analyses). We used log-log plots to check for model assumptions of proportionality. Intra-observer agreement was evaluated by Cohen's kappa.

## Figures

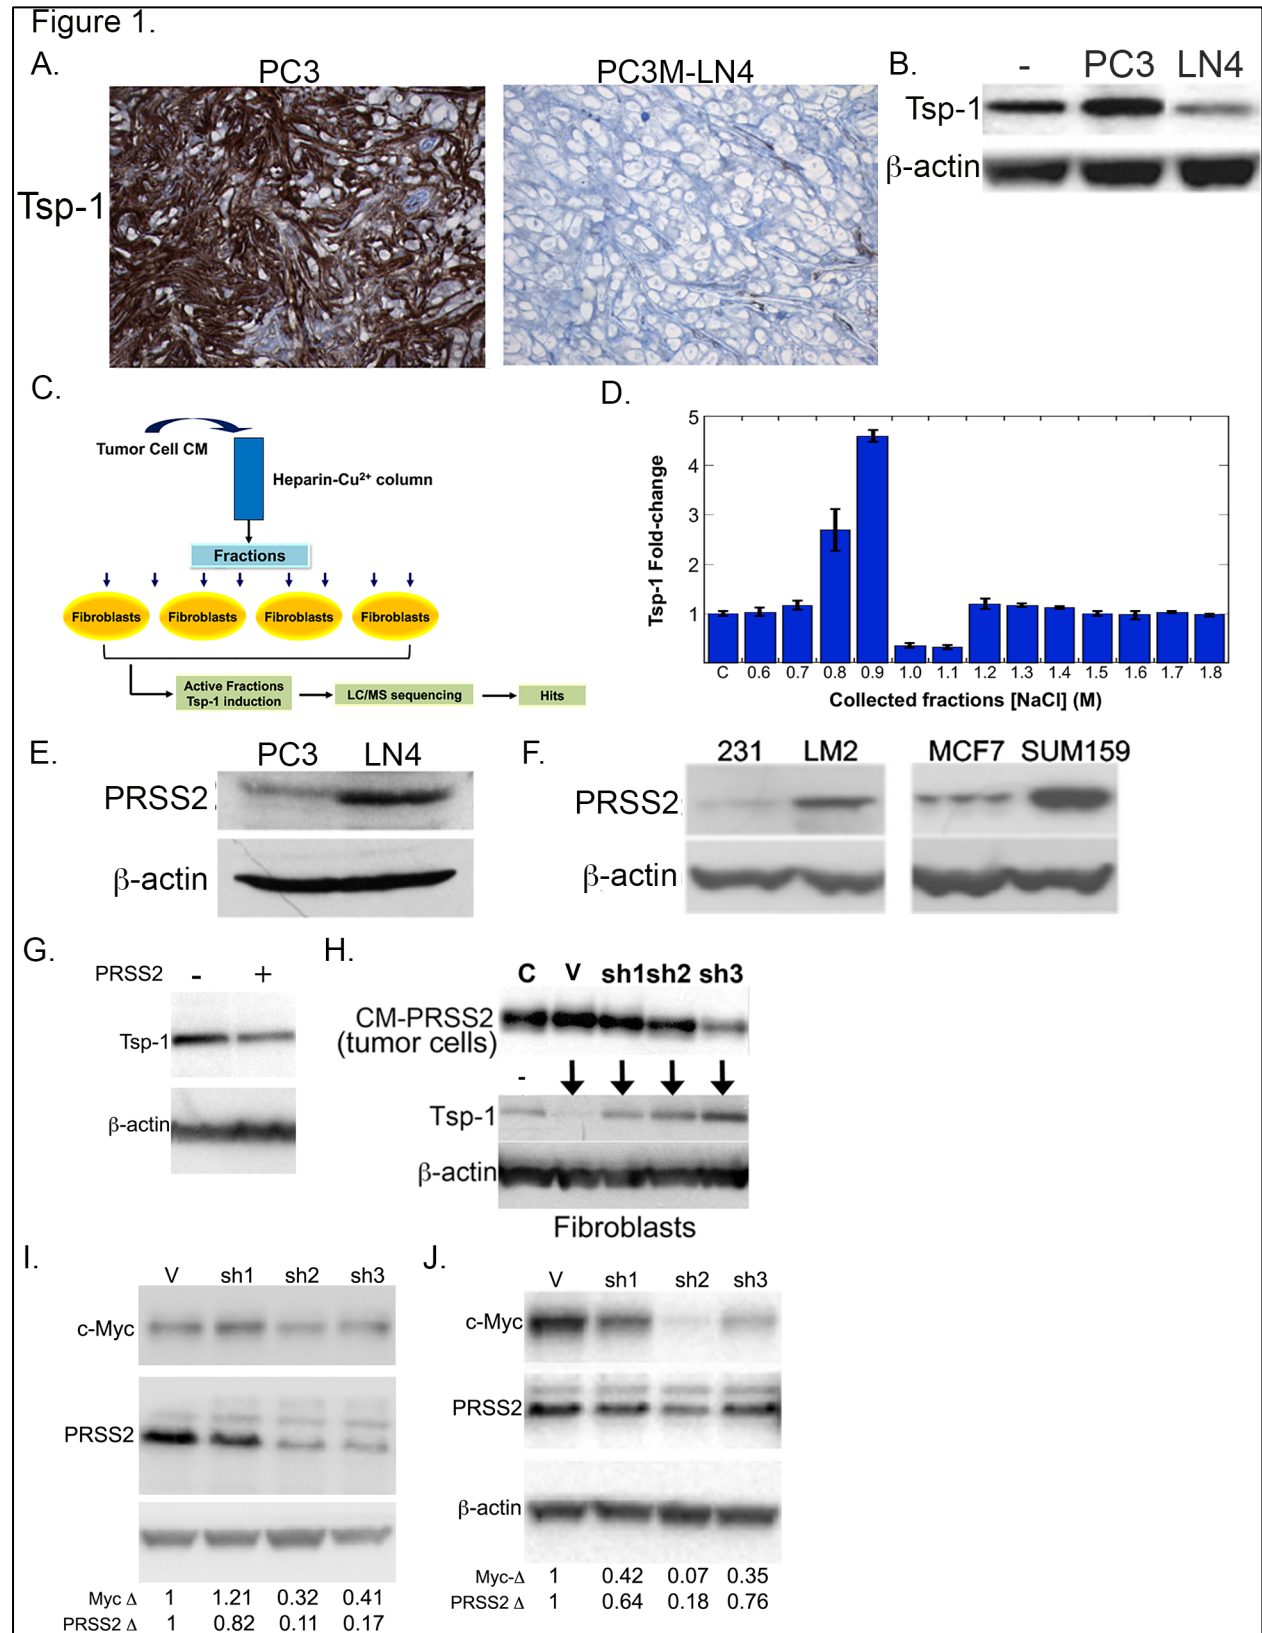

## **Figure 1. Breast and prostate cancer cells repress Tsp-1 in a paracrine manner via PRSS2**

- (A)** Immunohistochemistry (IHC) of thrombospondin-1 (Tsp-1) expression in tumors formed in the prostate gland of SCID mice by PC3 and PC3M-LN4 prostate cancer cells;
- (B)** Western blot of Tsp-1 and actin expression in WI-38 fibroblasts that were untreated (-) or treated with CM from PC3 and PC3M-LN4 (LN4) prostate cancer cells;
- (C)** Schematic for the identification of Tsp-1 repressing protein in PC3M-LN4 conditioned media;
- (D)** ELISA of Tsp-1 expression (normalized to total protein levels) in PC3M-LN4 fractions eluted from a Heparin-sepharose-Cu<sup>2+</sup> column;
- (E)** Western blot of PRSS2 and actin protein levels in PC3 and PC3M-LN4 prostate cancer cells;
- (F)** Western blot of PRSS2 and actin protein levels in MDA-MB-231 (231), MDA-MB-231-LM2 (LM2), MCF7 and SUM159 breast cancer cells;
- (G)** Tsp-1 and actn levels in WI-38 cells that were untreated (-) or treated with recombinant human PRSS2 (+);
- (H)** Upper panel: Western blot of PRSS2 in SUM159 cells that were untransfected (C), transfected with empty pLKO.1 vector (V), or pLKO.1 vector expressing 3 independent shRNA sequences directed against PRSS2 (sh1, sh2, sh3); Lower Panel: Western blot of Tsp-1 and actin in WI-38 cells that were untreated (-) or treated with conditioned media from SUM159 cells with empty vector (V) or PRSS2 shRNA;
- (I)** Western blot of Myc, PRSS2 and actin in SUM159 cells transfected with vector control (V) or three shRNA sequences directed against c-Myc (sh1, sh2 and sh3);
- (J)** Western blot of Myc, PRSS2 and actin in PC3M-LN4 cells transfected with vector control (V) or three shRNA sequences directed against c-Myc (sh1, sh2 and sh3);

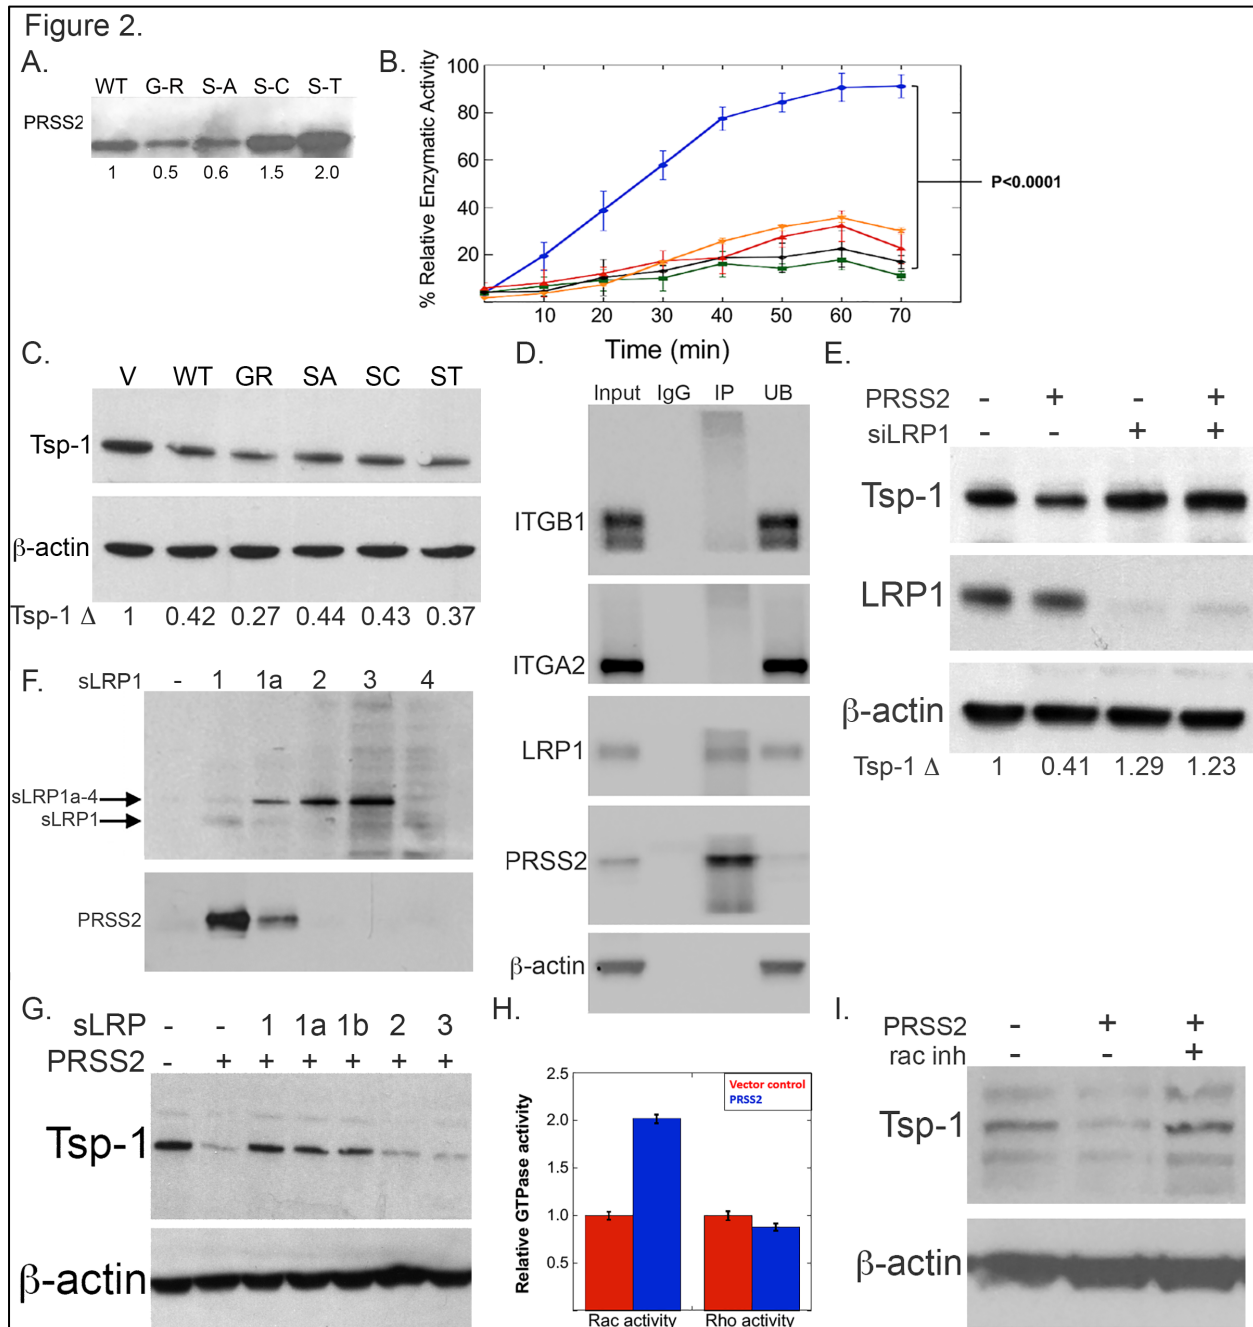

**Figure 2. PRSS2 represses Tsp-1 via enzyme independent binding to LRP1**  
**(A)** Western blot expression of PRSS2 protein levels in conditioned media of 293T cells transfected with WT PRSS2, PRSS2-G191R, PRSS2-S200A, PRSS2-S200C, and PRSS2-S200T;  
**(B)** Plot of enzymatic activity WT and mutant PRSS2 proteins relative to WT PRSS2 (%);

- (C)** Western blot of Tsp-1 and actin expression in WI38 fibroblasts treated with CM from 293T cells transfected with empty pCMV-Sport6 vector or vector expressing wild-type (WT) or a mutant version of PRSS2 (GR=G191R, SA=S200A, SC=S200C, ST=S200T);
- (D)** Western blot of Integrin  $\alpha$ 2 (ITGA2), Integrin  $\beta$ 1, ITGB1, LRP1, PRSS2, and actin following immunoprecipitation experiment of WI38 cells, using control IgG, or  $\alpha$ -PRSS2 (IP) antibody and unbound protein (UB);
- (E)** Western blot of Tsp-1, LRP1 and actin in WI38 cells that were untreated (-) or treated with PRSS2 (+) in the presence (+) or absence (-) of siRNA directed against LRP1;
- (F)** Western blot of secreted truncation mutants of LRP1 (sLRP1) containing binding domains 1-4, PRSS2, and actin from an immunoprecipitation experiment with  $\alpha$ -myc epitope antibody;
- (G)** Western blot of Tsp-1 and actin in WI38 cells that were untreated (-) or treated with PRSS2 (+) in the absence (-) or presence of secreted truncated mutants of PRSS2 comprised of binding domains 1, 1a, 1b, 2 and 3;
- (H)** Plot of GTP-bound Rac and Rho in WI38 cells treated with CM from 293T cells transfected with empty vector (red bars) or PRSS2 (blue bars);
- (I)** Western blot of Tsp-1 and actin expression in WI38 cells that were untreated (-) or treated with PRSS2 (+) in the absence (-) and presence (+) of a small molecule inhibitor of Rac1.

**Figure 3.**

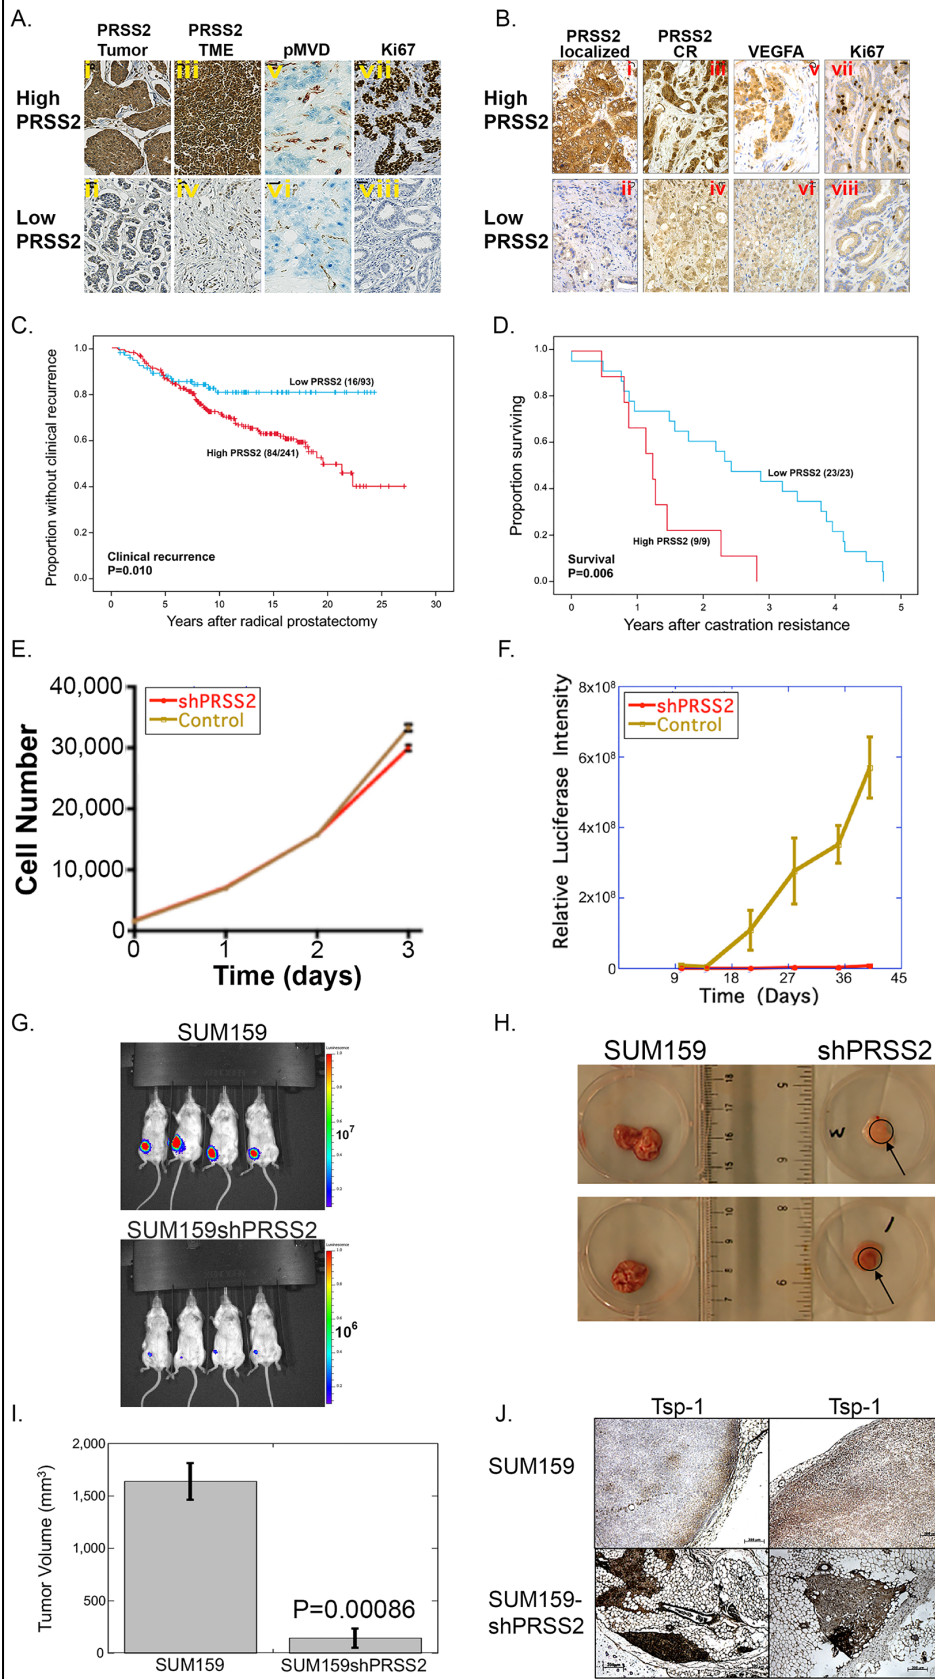



**Figure 3. PRSS2 is required for efficient tumor formation of SUM159 cells.**

**(A)** Immunohistochemical analysis of breast cancer patient series 1 for expression of: **(i)** PRSS2 in tumors with strong PRSS2 expression in tumor cells (high), **(ii)** PRSS2 in tumors with weak (low) PRSS2 expression in tumor cells, **(iii)** PRSS2 in tumors with strong PRSS2 expression in TME, **(iv)** PRSS2 in tumors with weak PRSS2 expression in the TME; **(v)** proliferating microvessel density (pMVD) in tumors with strong PRSS2 expression, **(vi)** pMVD in tumors with weak PRSS2 expression; **(vii)** tumor cell proliferation (Ki67) in tumors with strong PRSS2 expression; and **(viii)** Ki67 in tumors with weak PRSS2 expression. Original magnification x400.

**(B)** Immunohistochemical analysis of prostate cancer patient series for expression of: **(i)** PRSS2 in tumors with strong (high) tumor cell expression of PRSS2 in localized prostatic carcinoma; **(ii)**: PRSS2 in tumors with weak (low) tumor cell expression of PRSS2 in localized prostatic carcinoma; **(iii)** PRSS2 in tumors with strong expression of PRSS2 in castration resistant carcinoma; **(iv)** PRSS2 in tumors with weak expression of PRSS2 in castration resistant carcinoma; **(v)** VEGF-A in localized carcinoma with strong PRSS2 expression; **(vi)** VEGF-A in localized carcinoma with weak PRSS2 expression; **(vii)** Ki67 in localized carcinoma with strong PRSS2 expression; **(viii)** Ki67 in localized carcinoma with weak PRSS2 expression. Original magnification x400.

**(C)** Kaplan-Meier curve of clinical progression following radical prostatectomy of prostate cancer patients with strong and weak expression of PRSS2;

**(D)** Kaplan-Meier curve of overall survival following the acquisition of castration resistance of prostate cancer patients with strong and weak expression of PRSS2;

**(E)** Plot of *in vitro* proliferation of SUM159 and SUM159shPRSS2 cells over 3 days;

**(F)** Plot of *in vivo* luciferase activity of orthotopic tumors formed by mammary gland injection of SUM159 and SUM159shPRSS2 cells;

**(G)** Pictures of *in vivo* luciferase imaging of mice bearing tumors formed by SUM159 (upper panel) and SUM159shPRSS2 (lower panel) cells;

**(H)** Photographs of mammary tumors formed by SUM159 and SUM159shPRSS2 cells;

**(I)** Plot of volume of tumors formed by SUM159 and SUM159shPRSS2 cells;

**(J)** Immunohistochemistry of Tsp-1 in tumors formed by SUM159 and SUM159shPRSS2 cells (scale bar=200 $\mu$ m).

Figure 4.

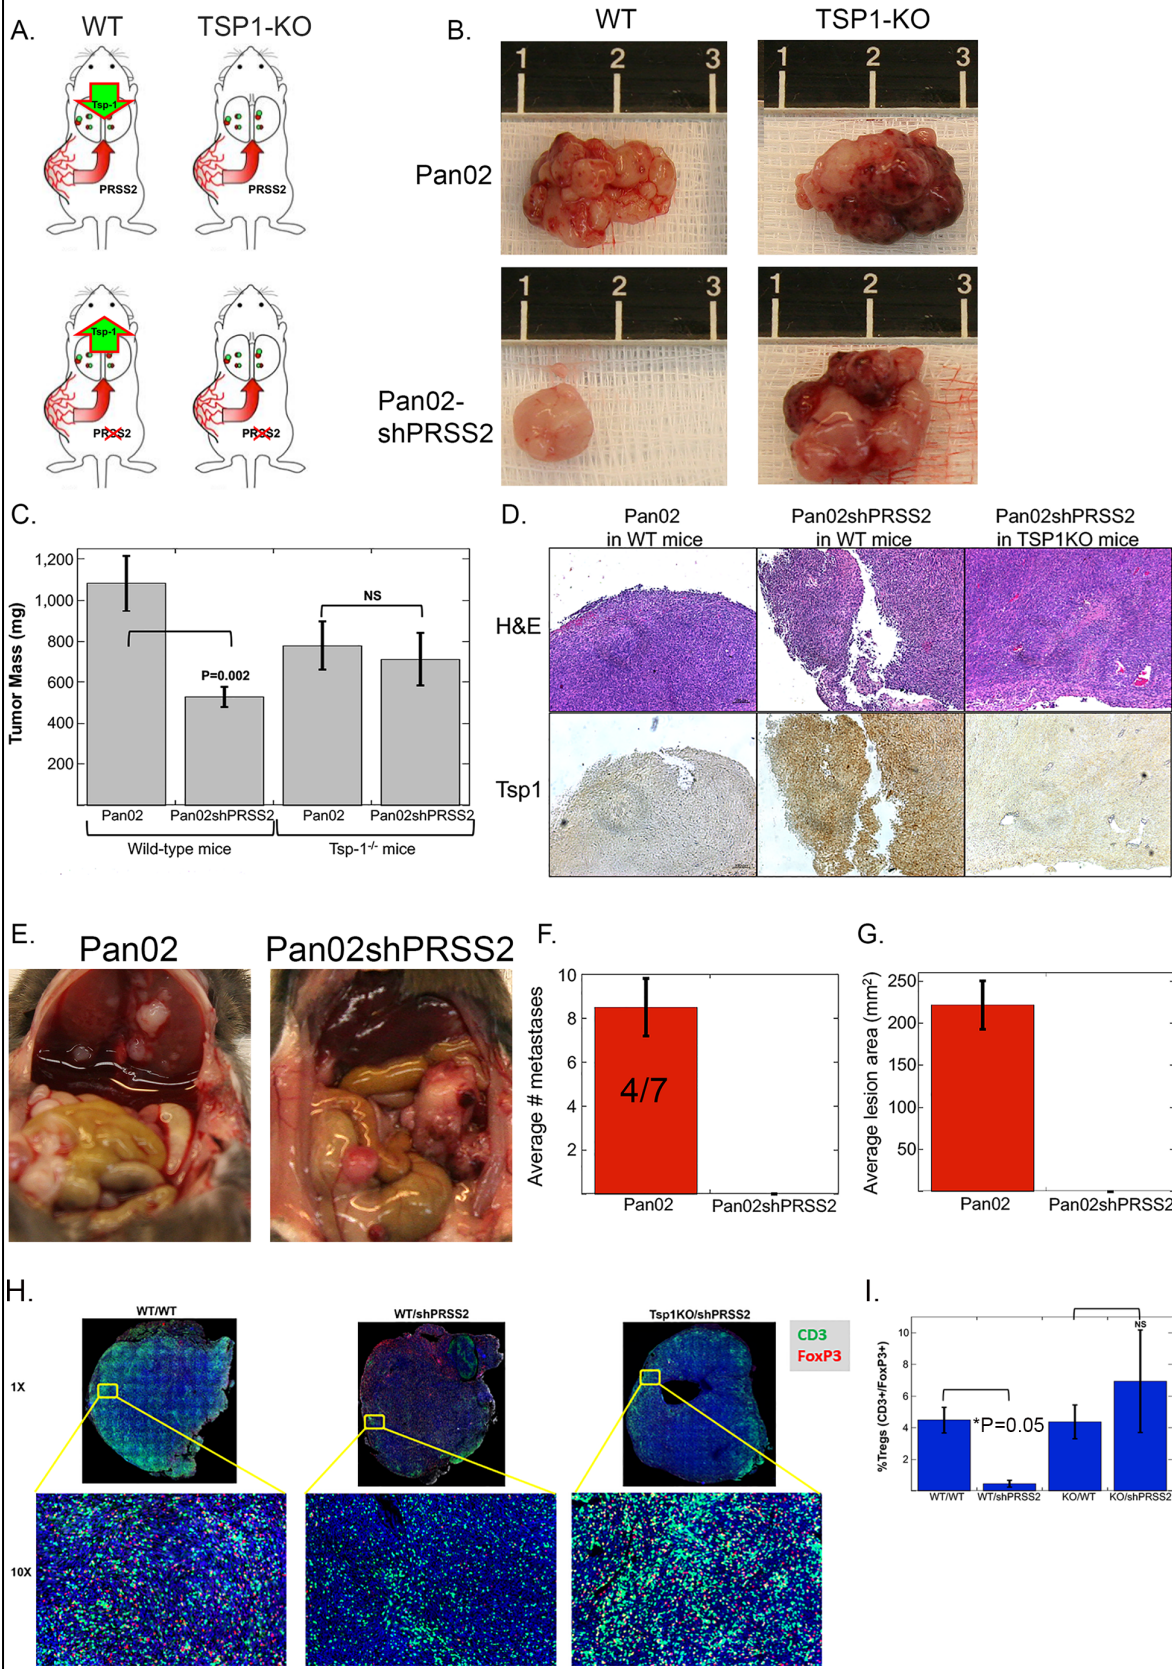

**Figure 4. Silencing PRSS2 inhibits primary pancreatic tumor growth and metastasis.**

- (A)** Schematic of tumor implantation strategy;
- (B)** Photographs of tumors formed by Pan02 and Pan02shPRSS2 cells in wild-type C57Bl6/J mice and *thbs1*<sup>-/-</sup> C57Bl6/J mice;
- (C)** Plot of average mass of tumors formed by Pan02 and Pan02shPRSS2 cells in wild-type C57Bl6/J mice and *thbs1*<sup>-/-</sup> C57Bl6/J mice;
- (D)** H&E and Tsp-1 immunohistochemical staining of tumors formed by Pan02 and Pan02shPRSS2 cells in wild-type C57Bl6/J mice and *thbs1*<sup>-/-</sup> C57Bl6/J mice (Scale bar=200 $\mu$ m);
- (E)** Photographs of the peritoneal cavities of mice bearing tumors formed by Pan02 and Pan02shPRSS2 cells in wild-type C57Bl6/J mice (arrows point to micrometastases visible by gross examination);
- (F)** Plot of the average number of macrometastatic lesions identified by gross examination of the peritoneal cavities of mice bearing tumors formed by Pan02 and Pan02shPRSS2 cells in wild-type C57Bl6/J mice (4/7 refers to the number of mice that developed macrometastatic lesions);
- (G)** Plot of the average area of macrometastatic lesions (in mm<sup>2</sup>) identified by gross examination of the peritoneal cavities of mice bearing tumors formed by Pan02 and Pan02shPRSS2 cells in wild-type C57Bl6/J mice;
- (H)** Immunofluorescence staining of CD3 (green) and FoxP3 (red) in tumors formed by Pan02 and Pan02shPRSS2 cells in WT C57Bl6/J mice and *thbs1*<sup>-/-</sup> C57Bl6/J mice;
- (I)** Plot of percentage of CD3<sup>+</sup>/FoxP3<sup>+</sup> T cells out of total CD3<sup>+</sup> T cells in tumors formed by Pan02 and Pan02shPRSS2 cells in WT C57Bl6/J mice and *thbs1*<sup>-/-</sup> C57Bl6/J mice.

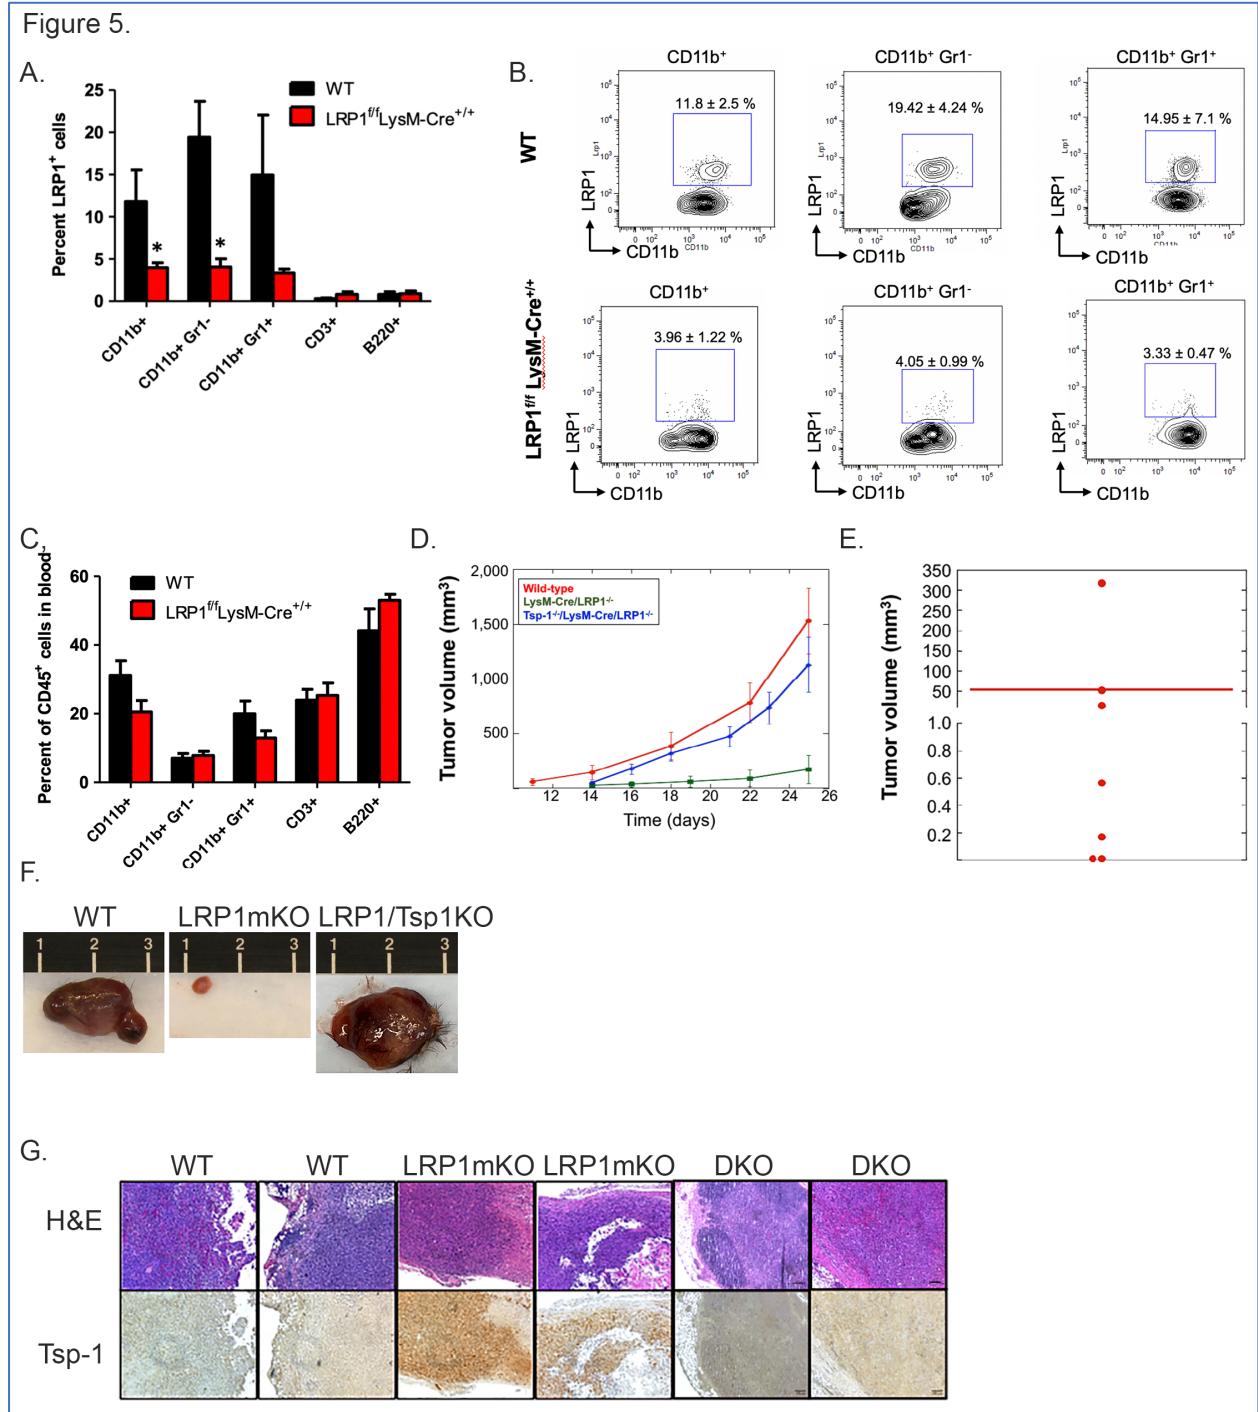

**Figure 5. Myeloid specific deletion of LRP1 inhibits tumor growth by preventing the repression of Tsp-1.**

(A) Plot of average LRP1 expression in multiple myeloid and lymphoid cells in wild-type and LysM-Cre/LRP1<sup>fl/fl</sup> mice as determined by FACS analysis;  
 (B) Representative FACS plots of LRP1 expression in myeloid and lymphoid cells in in wild-type and LysM-Cre/LRP1<sup>fl/fl</sup> mice;

- (C)** Plot of relative abundance of myeloid and lymphoid cells in wild-type and LysM-Cre/LRP1<sup>fl/fl</sup> mice as determined by FACS analysis;
- (D)** Plot of average tumor volume (as measured by calipers) of orthotopic mammary tumors formed by E0771 murine breast cancer cells in wildt-type (red line), LysM-Cre/LRP1<sup>fl/fl</sup> (green line), and and LysM-Cre/LRP1<sup>fl/fl</sup>/THBS1<sup>-/-</sup> (blue) mice;
- (E)** Dot plot of volume of tumors formed by E0771 cells in LysM-Cre/LRP1<sup>fl/fl</sup> mice;
- (F)** Photographs of tumors formed by E0771 murine breast cancer cells in wildt-type, LysM-Cre/LRP1<sup>fl/fl</sup>, and and LysM-Cre/LRP1<sup>fl/fl</sup>/THBS1<sup>-/-</sup> mice;
- (G)** H&E and Tsp-1 immunohistochemical staining of tumors formed by E0771 murine breast cancer cells in wildt-type, LysM-Cre/LRP1<sup>fl/fl</sup>, and Tsp-1<sup>-/-</sup>/LysM-Cre-LRP1<sup>fl/fl</sup> mice (scale bars =100 $\mu$ m).

**Table 1. Breast Cancer Series 1**

| Variables                     | PRSS2 Epithelium   |                    |     |           |                    | PRSS2 TME          |                    |     |           |                    |
|-------------------------------|--------------------|--------------------|-----|-----------|--------------------|--------------------|--------------------|-----|-----------|--------------------|
|                               | Low (n=458)<br>n % | High (n=60)<br>n % | OR  | 95%<br>CI | p-val <sup>a</sup> | Low (n=428)<br>n % | High (n=90)<br>n % | OR  | 95%<br>CI | P-val <sup>a</sup> |
| <b>Grade</b>                  |                    |                    |     |           | <0.001             |                    |                    |     |           | <0.001             |
| 1-2                           | 391 (91.1)         | 38 (8.9)           | 1.0 |           |                    | 369 (86.0)         | 60 (14.0)          | 1.0 |           |                    |
| 3                             | 67 (75.3)          | 22 (24.7)          | 3.4 | 1.9, 6.1  |                    | 59 (66.3)          | 30 (33.7)          | 3.1 | 1.9, 6.1  |                    |
| <b>ER</b>                     |                    |                    |     |           | 0.003              |                    |                    |     |           | 0.001              |
| Pos                           | 396 (90.2)         | 43 (9.8)           |     |           |                    | 373 (85.0)         | 66 (15.0)          |     |           |                    |
| Neg                           | 62 (73.5)          | 17 (21.5)          | 2.5 | 1.4, 4.7  |                    | 55 (69.6)          | 24 (30.4)          | 2.5 | 1.4, 4.3  |                    |
| <b>Mitotic ct<sup>b</sup></b> |                    |                    |     |           | <0.001             |                    |                    |     |           | <0.001             |
| Low <5.5                      | 349 (91.8)         | 31 (8.2)           |     |           |                    | 328 (86.3)         | 52 (13.7)          |     |           |                    |
| High >5.5                     | 103 (78.6)         | 28 (21.4)          | 3.1 | 1.8, 5.3  |                    | 93 (71.0)          | 38 (29.0)          | 2.6 | 1.6, 4.2  |                    |
| <b>Ki67<sup>b</sup></b>       |                    |                    |     |           | <0.001             |                    |                    |     |           | <0.001             |
| Low <31.5                     | 351 (91.6)         | 32 (8.4)           |     |           |                    | 333 (86.9)         | 50 (13.1)          |     |           |                    |
| High >31.5                    | 101 (78.9)         | 27 (21.1)          | 2.9 | 1.7, 5.1  |                    | 88 (68.8)          | 40 (31.2)          | 3.0 | 1.9, 4.9  |                    |
| <b>CK5/6<sup>c</sup></b>      |                    |                    |     |           | 0.008              |                    |                    |     |           | <0.001             |
| Neg 0                         | 128 (90.3)         | 12 (9.7)           |     |           |                    | 378 (84.8)         | 68 (15.2)          |     |           |                    |
| Pos >0                        | 52 (78.8)          | 14 (21.2)          | 2.4 | 1.2, 4.7  |                    | 44 (66.7)          | 22 (33.3)          | 2.4 | 1.0, 6.0  |                    |
| <b>pMVD<sup>d</sup></b>       |                    |                    |     |           | 0.013              |                    |                    |     |           |                    |
| Low <4.6                      | 112 (90.3)         | 12 (9.7)           |     |           |                    | 109 (87.9)         | 15 (12.1)          |     |           |                    |
| High >4.6                     | 34 (75.6)          | 11 (24.4)          | 3   | 1.2, 7.5  |                    | 31 (68.9)          | 14 (31.1)          | 3.3 | 1.4, 7.5  |                    |
| <b>GMP<sup>d</sup></b>        |                    |                    |     |           | 0.006              |                    |                    |     |           | 0.005              |
| Absent                        | 116 (89.9)         | 13 (10.1)          |     |           |                    | 112 (86.8)         | 17 (13.2)          |     |           |                    |
| Present                       | 29 (72.5)          | 11 (27.5)          | 3.4 | 1.4, 8.3  |                    | 27 (67.5)          | 13 (32.5)          | 3.2 | 1.4, 7.3  | 0.005              |

Series 1 (n=518). n: number of patients; OR: odds ratio; CI: confidence interval; ER: estrogen receptor; CK5/6: cytokeratin 5/6; pMVD: proliferative microvessel density; GMP: glomeruloid microvascular proliferation.

<sup>a</sup> Pearson's chi-squared test.

<sup>b</sup> Cut-off value by upper quartile. Seven cases lack information on Ki67 and mitotic count (mitoses/mm<sup>2</sup>).

<sup>c</sup> Six cases lack information on CK5/6 status.

<sup>d</sup> Three hundred and forty-nine cases lack information on pMVD (Nestin+/Ki67+ vessels) and GMP status.

**Table 2. Associations between PRSS2 expression and selected biomarkers in localized prostatic carcinomas (radical prostatectomies)**

| Variables         | PRSS2 <sup>1</sup> |               | P-value <sup>2</sup> |
|-------------------|--------------------|---------------|----------------------|
|                   | Low<br>n (%)       | High<br>n (%) |                      |
| <b>Ki67</b>       |                    |               | 0.051                |
| Low               | 18 (36)            | 32 (64)       |                      |
| High              | 10 (19)            | 43 (81)       |                      |
| <b>VEGF-A</b>     |                    |               | 0.009                |
| Low               | 27 (33)            | 54 (67)       |                      |
| High              | 1 (5)              | 20 (95)       |                      |
| <b>Prosaposin</b> |                    |               | <0.0005              |
| High              | 28 (36)            | 49 (64)       |                      |
| Low               | 0 (0)              | 25 (100)      |                      |

<sup>1</sup>Cytoplasmic expression, cut-off by median

<sup>2</sup>Pearson Chi-square test

## References

- 1 Gao, D. *et al.* Endothelial progenitor cells control the angiogenic switch in mouse lung metastasis. *Science* **319**, 195-198, doi:10.1126/science.1150224 (2008).
- 2 Gupta, G. P. & Massague, J. Cancer metastasis: building a framework. *Cell* **127**, 679-695, doi:10.1016/j.cell.2006.11.001 (2006).
- 3 Joyce, J. A. & Pollard, J. W. Microenvironmental regulation of metastasis. *Nat Rev Cancer* **9**, 239-252, doi:10.1038/nrc2618 (2009).
- 4 Catena, R. *et al.* Bone marrow-derived Gr1+ cells can generate a metastasis-resistant microenvironment via induced secretion of thrombospondin-1. *Cancer Discov* **3**, 578-589, doi:10.1158/2159-8290.CD-12-0476 (2013).
- 5 Kang, S. Y. *et al.* Prosaposin inhibits tumor metastasis via paracrine and endocrine stimulation of stromal p53 and Tsp-1. *Proc Natl Acad Sci U S A* **106**, 12115-12120, doi:0903120106 [pii] 10.1073/pnas.0903120106 (2009).
- 6 Kaplan, R. N. *et al.* VEGFR1-positive haematopoietic bone marrow progenitors initiate the pre-metastatic niche. *Nature* **438**, 820-827, doi:10.1038/nature04186 (2005).
- 7 O'Reilly, M. S. *et al.* Endostatin: an endogenous inhibitor of angiogenesis and tumor growth. *Cell* **88**, 277-285 (1997).
- 8 S, P. The distribution of secondary growths in cancer of the breast. 1889. *Cancer Metastasis Rev.* **8**, 98-101 (1889).
- 9 Leung, D. W., Cachianes, G., Kuang, W. J., Goeddel, D. V. & Ferrara, N. Vascular endothelial growth factor is a secreted angiogenic mitogen. *Science* **246**, 1306-1309, doi:10.1126/science.2479986 (1989).
- 10 Senger, D. R. *et al.* Tumor cells secrete a vascular permeability factor that promotes accumulation of ascites fluid. *Science* **219**, 983-985, doi:10.1126/science.6823562 (1983).
- 11 Gabrilovich, D. *et al.* Vascular endothelial growth factor inhibits the development of dendritic cells and dramatically affects the differentiation of multiple hematopoietic lineages in vivo. *Blood* **92**, 4150-4166 (1998).
- 12 Li, B. *et al.* Vascular endothelial growth factor blockade reduces intratumoral regulatory T cells and enhances the efficacy of a GM-CSF-secreting cancer immunotherapy. *Clin Cancer Res* **12**, 6808-6816, doi:10.1158/1078-0432.CCR-06-1558 (2006).
- 13 Motz, G. T. *et al.* Tumor endothelium FasL establishes a selective immune barrier promoting tolerance in tumors. *Nat Med* **20**, 607-615, doi:10.1038/nm.3541 (2014).
- 14 Oyama, T. *et al.* Vascular endothelial growth factor affects dendritic cell maturation through the inhibition of nuclear factor-kappa B activation in hemopoietic progenitor cells. *J Immunol* **160**, 1224-1232 (1998).
- 15 Martin-Manso, G. *et al.* Thrombospondin 1 promotes tumor macrophage recruitment and enhances tumor cell cytotoxicity of differentiated U937 cells. *Cancer Res* **68**, 7090-7099, doi:10.1158/0008-5472.CAN-08-0643 (2008).
- 16 Wang, S. *et al.* Development of a prosaposin-derived therapeutic cyclic peptide that targets ovarian cancer via the tumor microenvironment. *Sci Transl Med* **8**, 329ra334, doi:10.1126/scitranslmed.aad5653 (2016).



- 17 Bjartell, A. *et al.* Expression of tumor-associated trypsinogens (TAT-1 and TAT-2) in prostate cancer. *Prostate* **64**, 29-39, doi:10.1002/pros.20236 (2005).
- 18 Kasurinen, A. *et al.* Tumor-associated trypsin inhibitor (TATI) and tumor-associated trypsin-2 (TAT-2) predict outcomes in gastric cancer. *Acta Oncol* **59**, 681-688, doi:10.1080/0284186X.2020.1733655 (2020).
- 19 Narasimhan, A. *et al.* Identification of Potential Serum Protein Biomarkers and Pathways for Pancreatic Cancer Cachexia Using an Aptamer-Based Discovery Platform. *Cancers (Basel)* **12**, doi:10.3390/cancers12123787 (2020).
- 20 Paju, A. *et al.* Expression of trypsinogen-1, trypsinogen-2, and tumor-associated trypsin inhibitor in ovarian cancer: prognostic study on tissue and serum. *Clin Cancer Res* **10**, 4761-4768, doi:10.1158/1078-0432.CCR-0204-03 (2004).
- 21 Rajkumar, T. *et al.* Identification and validation of genes involved in gastric tumorigenesis. *Cancer Cell Int* **10**, 45, doi:10.1186/1475-2867-10-45 (2010).
- 22 Witt, H. *et al.* A degradation-sensitive anionic trypsinogen (PRSS2) variant protects against chronic pancreatitis. *Nat Genet* **38**, 668-673, doi:10.1038/ng1797 (2006).
- 23 Mikhailenko, I. *et al.* Recognition of alpha 2-macroglobulin by the low density lipoprotein receptor-related protein requires the cooperation of two ligand binding cluster regions. *J Biol Chem* **276**, 39484-39491, doi:10.1074/jbc.M104382200 (2001).
- 24 Lillis, A. P. *et al.* Murine low-density lipoprotein receptor-related protein 1 (LRP) is required for phagocytosis of targets bearing LRP ligands but is not required for C1q-triggered enhancement of phagocytosis. *J Immunol* **181**, 364-373, doi:10.4049/jimmunol.181.1.364 (2008).
- 25 Lillis, A. P., Mikhailenko, I. & Strickland, D. K. Beyond endocytosis: LRP function in cell migration, proliferation and vascular permeability. *J Thromb Haemost* **3**, 1884-1893, doi:10.1111/j.1538-7836.2005.01371.x (2005).
- 26 Mantuano, E., Jo, M., Gonias, S. L. & Campana, W. M. Low density lipoprotein receptor-related protein (LRP1) regulates Rac1 and RhoA reciprocally to control Schwann cell adhesion and migration. *J Biol Chem* **285**, 14259-14266, doi:10.1074/jbc.M109.085126 (2010).
- 27 Merino, P. *et al.* Urokinase-type Plasminogen Activator (uPA) Binding to the uPA Receptor (uPAR) Promotes Axonal Regeneration in the Central Nervous System. *J Biol Chem* **292**, 2741-2753, doi:10.1074/jbc.M116.761650 (2017).
- 28 Naumov, G. N. *et al.* A Model of Human Tumor Dormancy: An Angiogenic Switch From the Nonangiogenic Phenotype  
10.1093/jnci/djj068. *J Natl Cancer Inst* **98**, 316-325 (2006).
- 29 Watnick, R. S. *et al.* Thrombospondin-1 repression is mediated via distinct mechanisms in fibroblasts and epithelial cells. *Oncogene* **34**, 2823-2835, doi:10.1038/onc.2014.228 (2015).
- 30 Corbett, T. H. *et al.* Induction and chemotherapeutic response of two transplantable ductal adenocarcinomas of the pancreas in C57BL/6 mice. *Cancer Res* **44**, 717-726 (1984).
- 31 Kirkegard, J., Mortensen, F. V. & Cronin-Fenton, D. Chronic Pancreatitis and Pancreatic Cancer Risk: A Systematic Review and Meta-analysis. *Am J Gastroenterol* **112**, 1366-1372, doi:10.1038/ajg.2017.218 (2017).

- 32 Sadr-Azodi, O. *et al.* Pancreatic Cancer Following Acute Pancreatitis: A Population-based Matched Cohort Study. *Am J Gastroenterol* **113**, 1711-1719, doi:10.1038/s41395-018-0255-9 (2018).
- 33 Wang, H. *et al.* CD36-mediated metabolic adaptation supports regulatory T cell survival and function in tumors. *Nat Immunol* **21**, 298-308, doi:10.1038/s41590-019-0589-5 (2020).
- 34 Dawson, D. W. *et al.* CD36 mediates the In vitro inhibitory effects of thrombospondin-1 on endothelial cells. *Journal of Cell Biology* **138**, 707-717 (1997).
- 35 Isenberg, J. S. *et al.* Thrombospondin-1 inhibits nitric oxide signaling via CD36 by inhibiting myristic acid uptake. *J Biol Chem* **282**, 15404-15415, doi:10.1074/jbc.M701638200 (2007).
- 36 Naumov, G. N. *et al.* A model of human tumor dormancy: an angiogenic switch from the nonangiogenic phenotype. *Journal of the National Cancer Institute* **98**, 316-325, doi:10.1093/jnci/djj068 (2006).
- 37 Watnick, R. S. *et al.* Thrombospondin-1 repression is mediated via distinct mechanisms in fibroblasts and epithelial cells. *Oncogene*, doi:10.1038/onc.2014.228 (2014).
- 38 Kruger, K. *et al.* Expression of Nestin associates with BRCA1 mutations, a basal-like phenotype and aggressive breast cancer. *Scientific reports* **7**, 1089, doi:10.1038/s41598-017-00862-w (2017).
- 39 Askeland, C. *et al.* Stathmin expression associates with vascular and immune responses in aggressive breast cancer subgroups. *Scientific reports* **10**, 2914, doi:10.1038/s41598-020-59728-3 (2020).
- 40 Stefansson, I. M., Salvesen, H. B. & Akslen, L. A. Vascular proliferation is important for clinical progress of endometrial cancer. *Cancer Res* **66**, 3303-3309, doi:10.1158/0008-5472.CAN-05-1163 (2006).
- 41 Straume, O. *et al.* Prognostic importance of glomeruloid microvascular proliferation indicates an aggressive angiogenic phenotype in human cancers. *Cancer Res* **62**, 6808-6811 (2002).
- 42 Straume, O. & Akslen, L. A. Alterations and prognostic significance of p16 and p53 protein expression in subgroups of cutaneous melanoma. *Int J Cancer* **74**, 535-539, doi:10.1002/(sici)1097-0215(19971021)74:5<535::aid-ijc10>3.0.co;2-5 (1997).
